# Supplementary material for: Effect of ligand sequence-specific modification on DNA hybrid catalysis
Source: Royal Society of Chemistry journal article supplement (doi:10.1039/c7ob01249g), 2017-01-01
Supplement: c7ob01249g1.pdf [file c7ob01249g1.pdf]

## SUPPLEMENTARY INFORMATION

# Effect of Ligand Sequence-Specific Modification on DNA Hybrid Catalysis

H. Zhou,<sup>a</sup> D. Chen,<sup>a</sup> J. K. Bai,<sup>a</sup> X. L. Sun,<sup>a</sup> C. Li<sup>\*a</sup> and R. Z. Qiao<sup>\*ab</sup>

<sup>a</sup> *State Key Laboratory of Chemical Resource Engineering, Beijing University of Chemical Technology, Beijing 100029, P. R. China*

<sup>b</sup> *State Key Laboratory of Natural and Biomimetic Drugs School of Pharmaceutical Sciences, Peking University Health Science Center, Beijing, 100083, P. R. China*

**Correspondence:** Prof. Renzhong Qiao, State Key Laboratory of Chemical Resource Engineering, Beijing University of Chemical Technology, Beijing 100029, P. R. China

**E-mail:** [qiao\\_group@163.com](mailto:qiao_group@163.com)

Prof. Chao Li, State Key Laboratory of Chemical Resource Engineering, Beijing University of Chemical Technology, Beijing 100029, P. R. China

**E-mail:** [lichao@mail.buct.edu.cn](mailto:lichao@mail.buct.edu.cn)

**Fax:** 86-010-64416428

## Contents

|                                                                                                                        |    |
|------------------------------------------------------------------------------------------------------------------------|----|
| 1. NMR and HRMS spectra of <b>hmbpy</b> .....                                                                          | 1  |
| 2. NMR and HRMS spectra of <b>Py<sub>4</sub>-dmbpy</b> .....                                                           | 2  |
| 3. <sup>1</sup> H NMR spectra of <b>1a-d</b> .....                                                                     | 3  |
| 4. Preparation and characteristics of racemic Friedel-Crafts alkylation products <b>3a-3g</b> .....                    | 5  |
| 5. Preparation and HPLC analysis of enantioselective Friedel-Crafts alkylation products <b>3a-3g</b> ..                | 13 |
| 6. HPLC analysis of product <b>3d</b> catalyzed by oligonucleotides/ <b>Py<sub>4</sub>-dmbpy-Cu<sup>II</sup></b> ..... | 20 |
| 7. Basis spectra of SVD analysis.....                                                                                  | 24 |
| 8. UV-Vis titration spectra of <b>Py<sub>4</sub>-dmbpy-Cu<sup>II</sup></b> with alternative oligonucleotides.....      | 24 |

# NMR and HRMS spectra of hmbpy

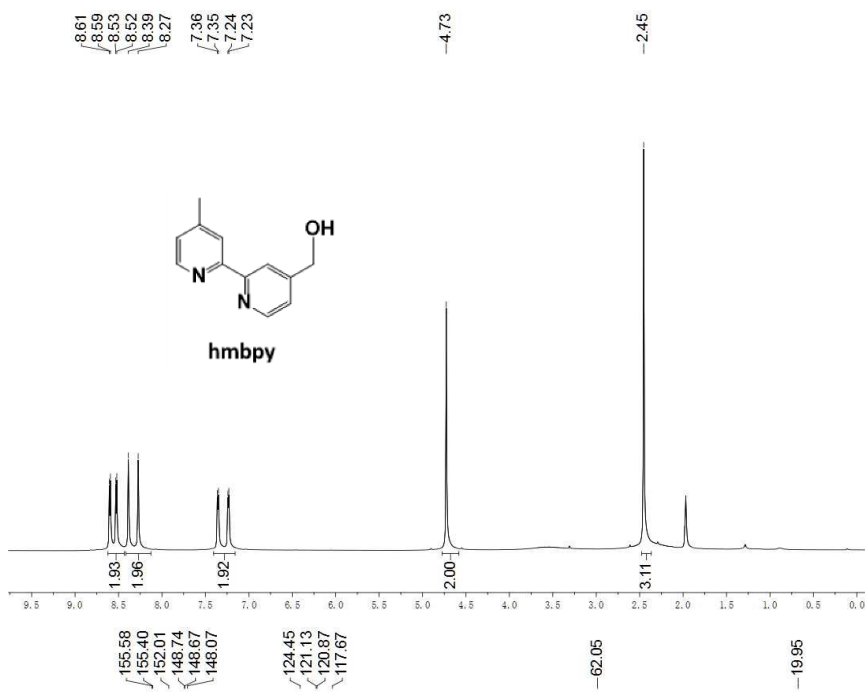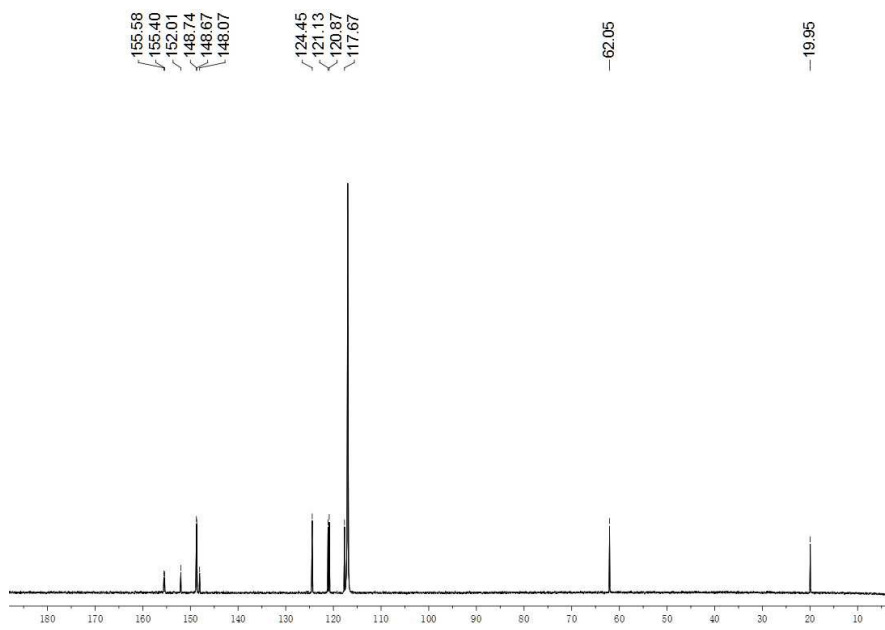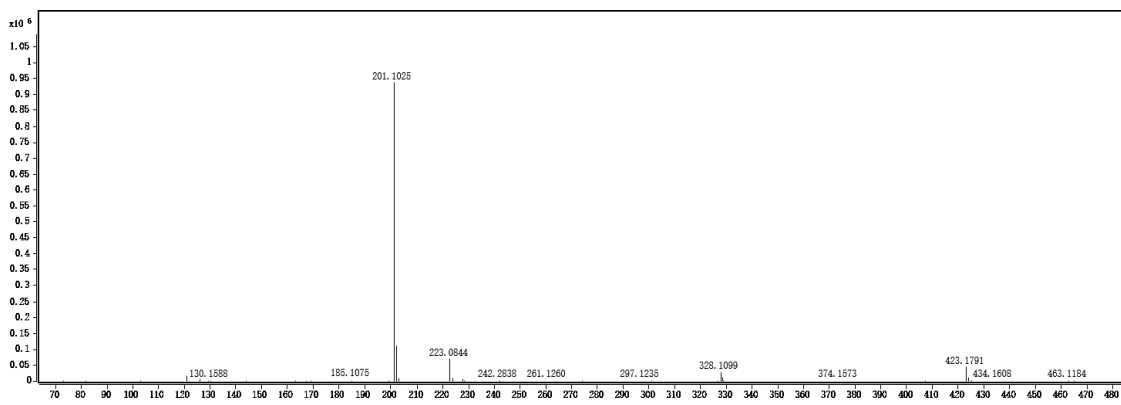

# NMR and HRMS spectra of Py<sub>4</sub>-dmbpy

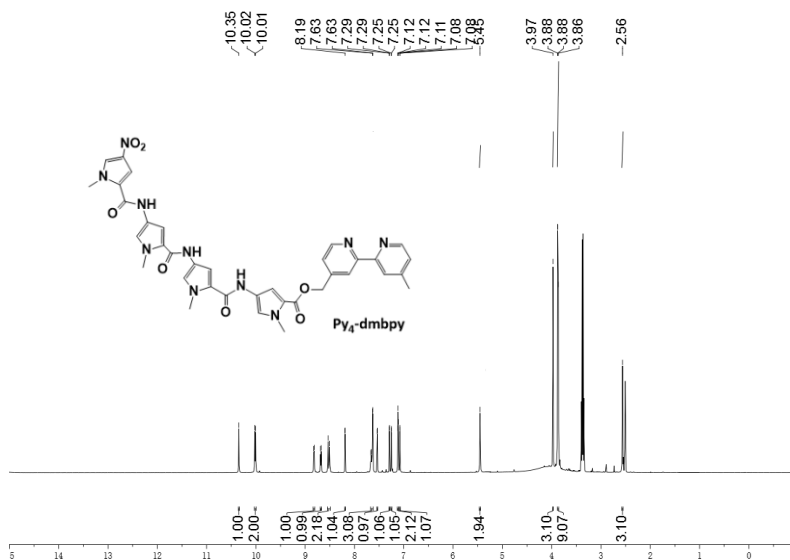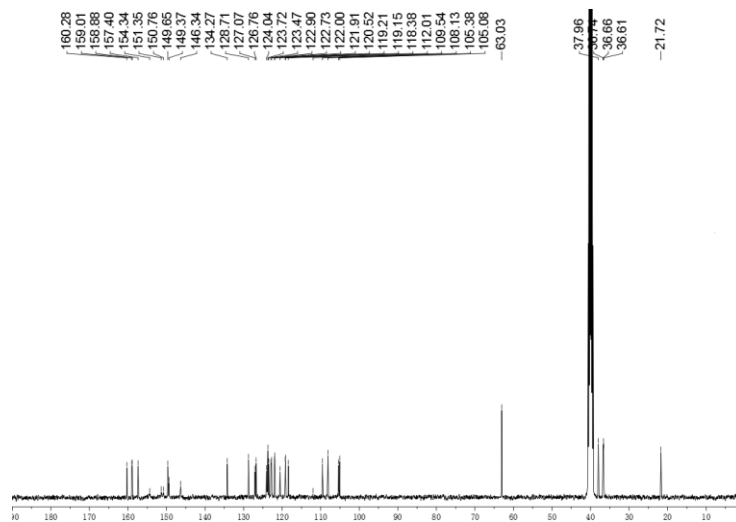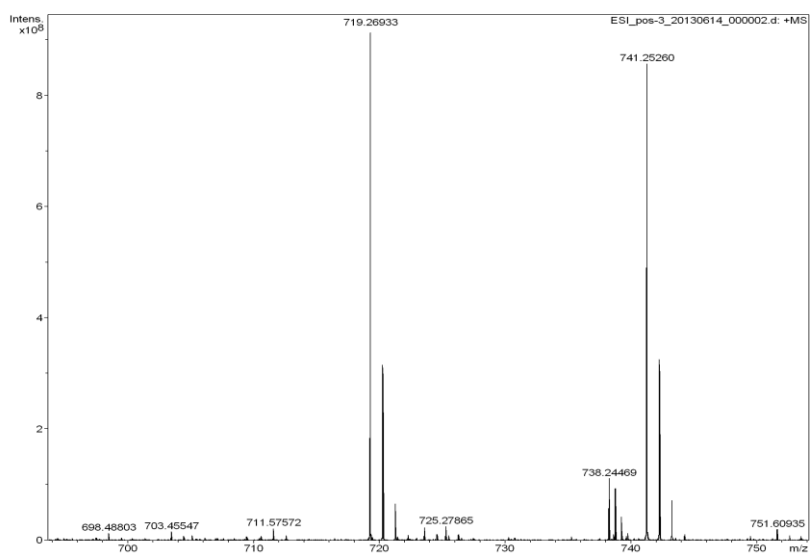

# <sup>1</sup>H NMR spectra of 1a-d

## (E)-1-(1-methyl-1H-imidazol-2-yl)-3-phenylprop-2-en-1-one (1a)

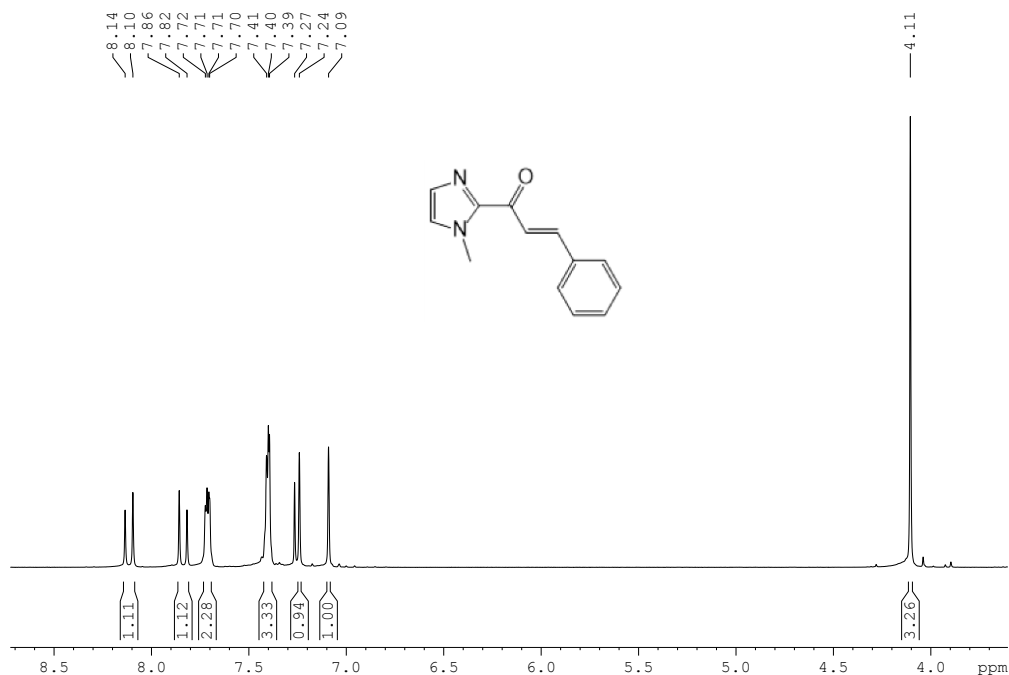

<sup>1</sup>H-NMR(400 MHz, CDCl<sub>3</sub>) δ/ppm= 4.11 (s, 3H), 7.09 (s, 1H), 7.24 (s, 1H), 7.39-7.41 (m, 3H), 7.70-7.72 (m, 2H), 7.82 (d, 1H, *J*=16 Hz), 8.10 (d, 1H, *J*=16 Hz)

## (E)-3-(4-methoxyphenyl)-1-(1-methyl-1H-imidazol-2-yl)prop-2-en-1-one (1b)

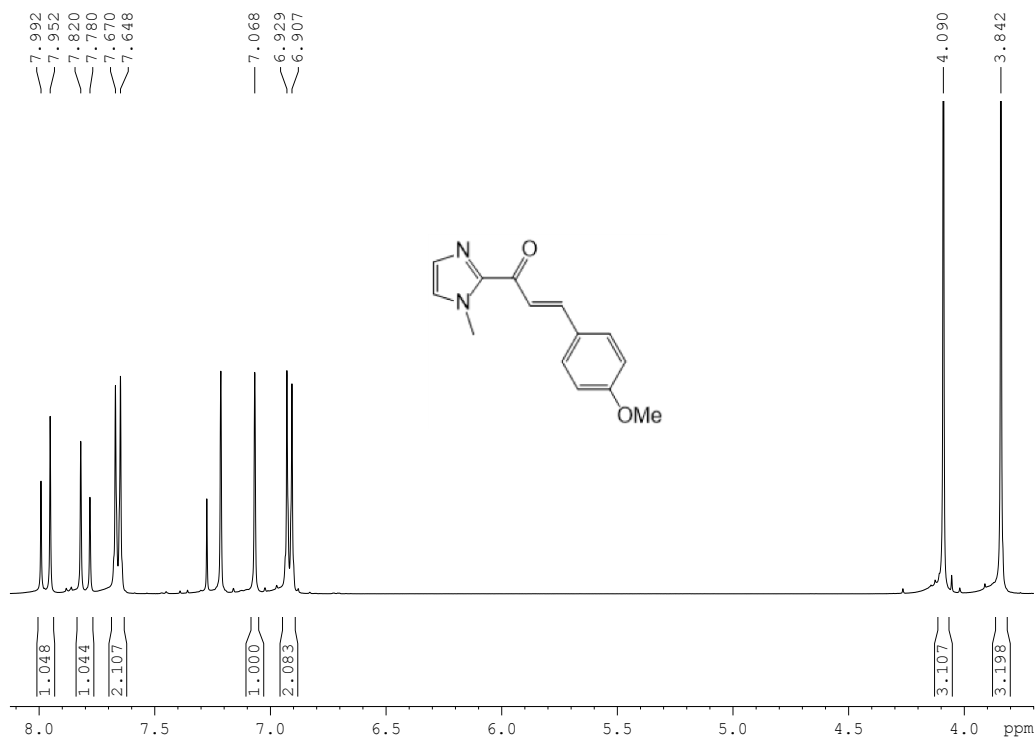

<sup>1</sup>H-NMR(400MHz, CDCl<sub>3</sub>) δ/ppm=3.84 (s, 3H), 4.09 (s, 3H), 6.92 (d, 2H, *J*= 8.8 Hz), 7.07 (s, 1H), 7.21 (s, 1H), 7.65 (d, 2H, *J*= 8.8 Hz), 7.80 (d, 1H, *J*= 16.0 Hz), 7.95 (d, 1H, *J*= 16.0 Hz)

(E)-3-(2-bromophenyl)-1-(1-methyl-1H-imidazol-2-yl)prop-2-en-1-one (1c)

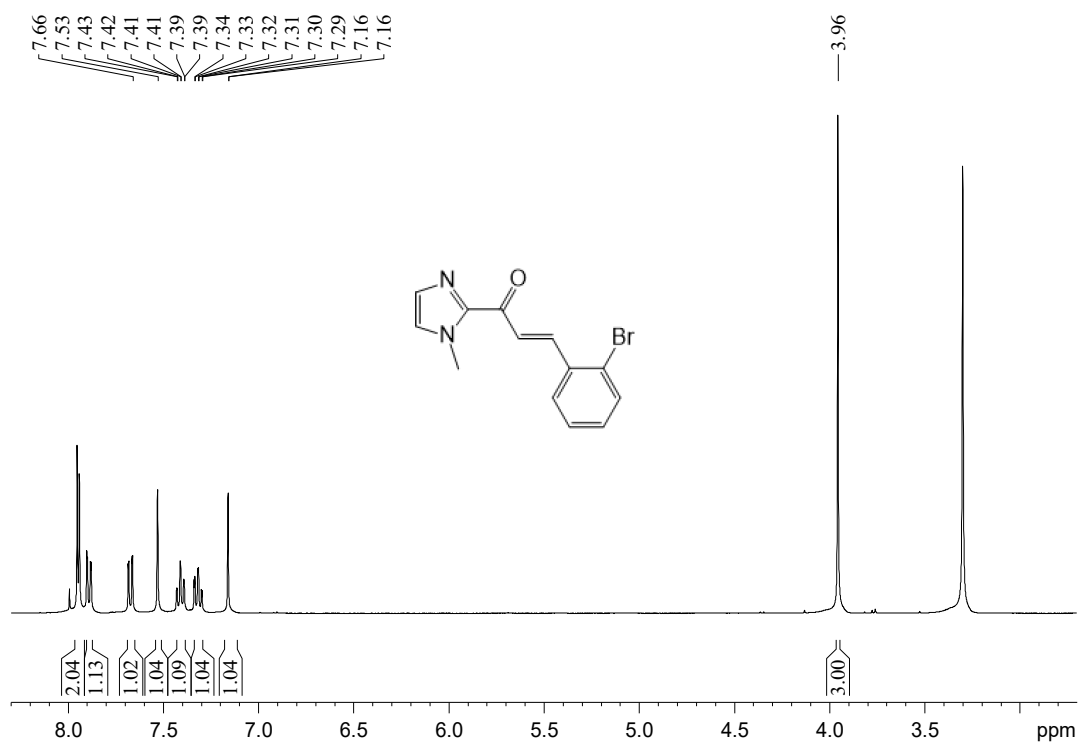

<sup>1</sup>H-NMR (400 MHz, DMSO-*d*<sub>6</sub>) δ/ppm=3.96 (s, 3H), 7.16 (s, 1H), 7.34 (m, 1H), 7.42 (m, 1H), 7.53 (s, 1H), 7.66 (dd, 1H, *J* = 1.1 Hz, *J* = 6.9 Hz), 7.90 (dd, 1H, *J* = 1.2 Hz, *J* = 6.4 Hz), 7.95 (d, 1H, *J* = 15.5 Hz).

(E)-1-(1-methyl-1H-imidazol-2-yl)but-2-en-1-one (1d)

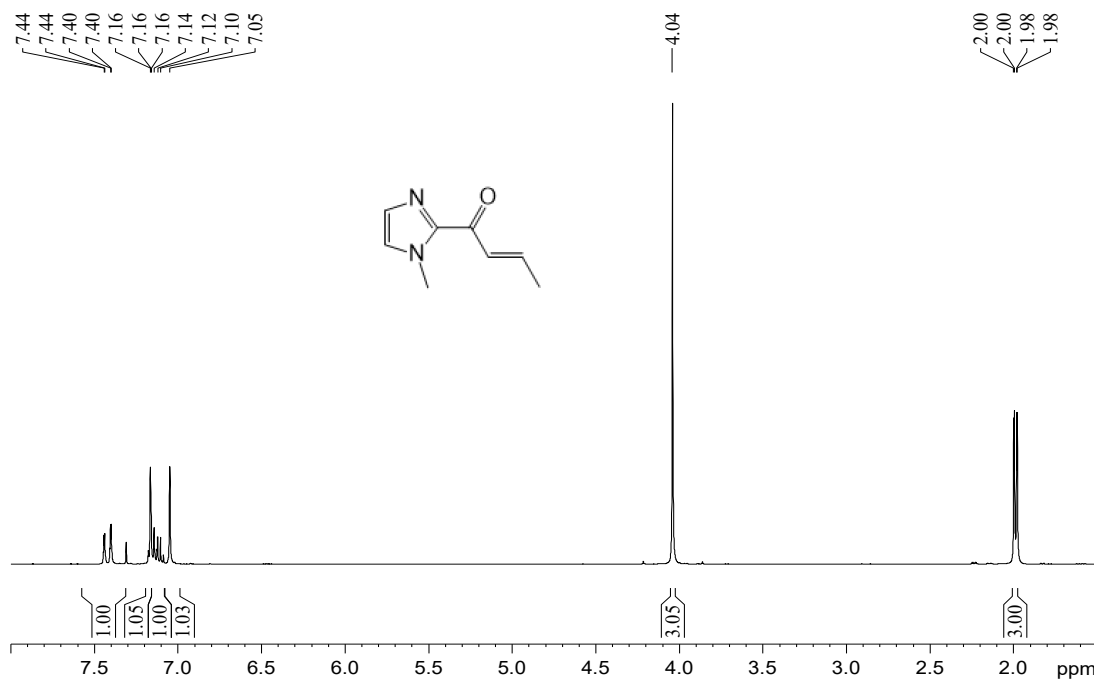

<sup>1</sup>H-NMR (400 MHz, CDCl<sub>3</sub>) δ/ppm=1.99 (dd, 3H, *J* = 8.0 Hz, *J* = 8.0 Hz), 4.04 (s, 3H), 7.05 (s, 1H), 7.12 (dq, 1H), 7.16 (dq, 1H), 7.43 (dd, 1H, *J* = 16.0 Hz, *J* = 16.0 Hz).

## Preparation and characteristics of racemic Friedel-Crafts alkylation products 3a-3g

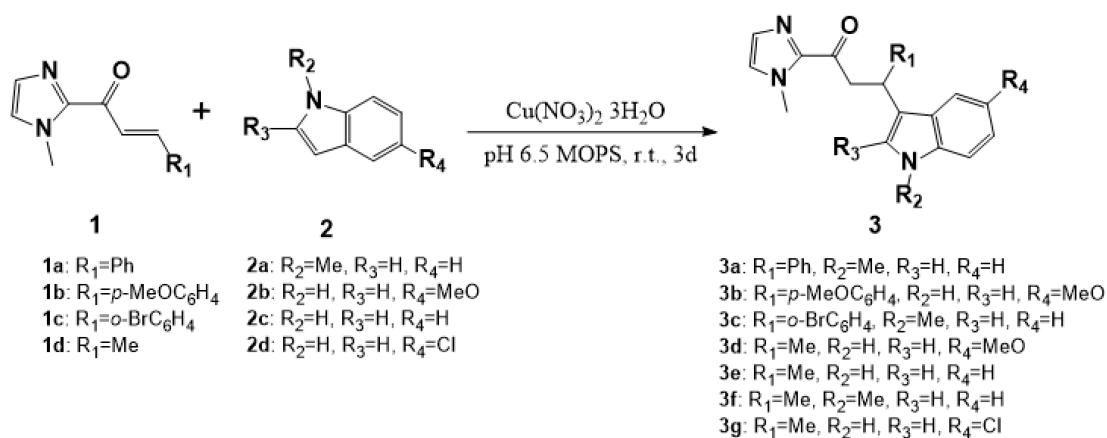

### Preparation of a 500 mL 30 mM MOPS buffer (pH 6.5)

3.1389 g (15 mmol) of 3-(*N*-morpholino) propanesulfonic acid (MOPS, MW = 209.26 g/mol) were dissolved in 100 mL of ultrapure water which is tracked by pH meter. A 0.1 M solution of NaOH (MW = 40.00 g/mol) in ultrapure water was added to adjust pH value to 6.5. Transfer this solution to a 500 mL volumetric flask, then dilute with ultrapure water to volume and mix.

### General procedure A

An oven-dried 500 mL round-bottomed flask was charged with Cu(NO<sub>3</sub>)<sub>2</sub>·3H<sub>2</sub>O (0.8 mmol, 2.0 equiv) in 50 mL pH = 6.5 MOPS buffer. Then the  $\alpha$ ,  $\beta$ -unsaturated substrate (0.40 mmol, 1.0 equiv) and the desired indole (2.0 mmol, 5 equiv) were added. The solution was stirred at r.t. for 3 d. The reaction was eventually extracted with Et<sub>2</sub>O (3 x 25 mL). The combined organic layer dried over anhydrous Na<sub>2</sub>SO<sub>4</sub>, gravity filtered and concentrated under reduced pressure. The crude product was purified by flash chromatography over silica gel.

**1-(1-methyl-1*H*-imidazol-2-yl)-3-(1-methyl-1*H*-indol-3-yl)-3-phenylpropan-1-one (3a)**

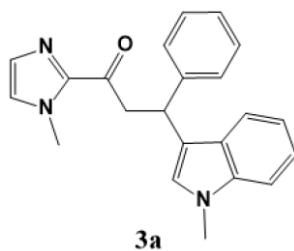

Following the general procedure A: **1a** (84.9 mg, 0.40 mmol), **2a** (262.4 mg, 2.0 mmol), Cu(NO<sub>3</sub>)<sub>2</sub>·3H<sub>2</sub>O (193 mg, 0.80 mmol). The title compound (molecular formula: C<sub>22</sub>H<sub>21</sub>N<sub>3</sub>O, MW = 343.43 g/mol, 110 mg) was isolated as a brown solid in 80% yield. <sup>1</sup>H NMR (CD<sub>3</sub>OD, 400 MHz): δ/ppm=3.68 (s, 3H), 3.82-3.88 (m, 4H), 4.00 (dd, *J* = 15.9 Hz, *J* = 7.5 Hz, 1H), 5.04 (t, *J* = 7.8 Hz, 1H), 6.93 (s, 1H), 6.96-7.00 (m, 2H), 7.13 (s, 3H), 7.22 (t, *J* = 8.0 Hz, 3H), 7.38 (d, *J* = 7.3 Hz, 2H), 7.47 (d, *J* = 7.9 Hz, 1H). <sup>13</sup>C NMR (CDCl<sub>3</sub>, 100 MHz): δ/ppm= 32.9 (q), 36.3 (q), 38.3 (d), 45.7 (t), 109.2 (d), 118.1 (s), 118.9 (d), 119.8 (d), 121.7 (d), 126.3 (d), 126.4 (d), 127.1 (d), 128.1 (s), 128.5 (d), 129.1 (d), 137.4 (s), 143.4 (s), 144.8 (s), 191.3 (s). HRMS (ESI) calcd. for C<sub>22</sub>H<sub>22</sub>N<sub>3</sub>O: 344.1763 ([M+H]<sup>+</sup>), found 344.1759 ([M+H]<sup>+</sup>).

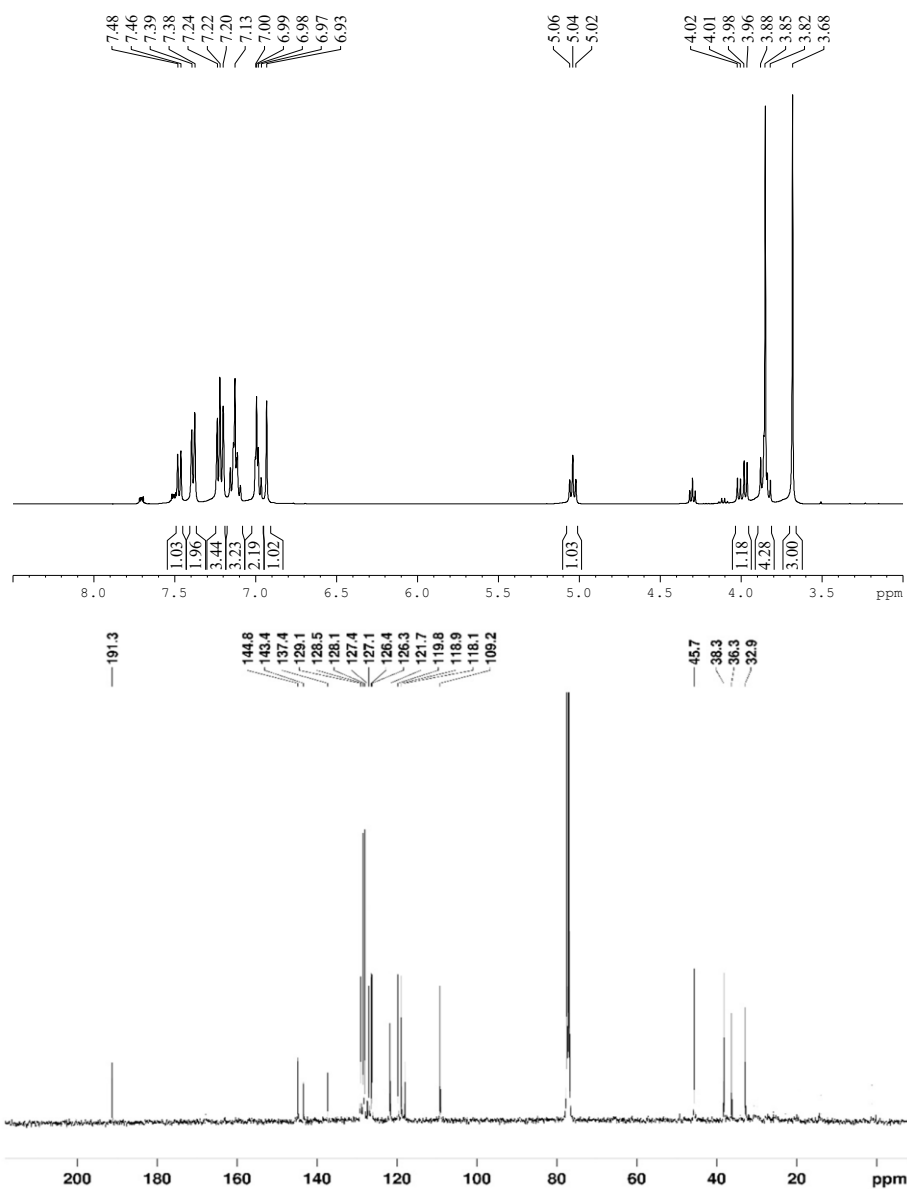



**3-(5-methoxy-1H-indol-3-yl)-3-(4-methoxyphenyl)-1-(1-methyl-1H-imidazol-2-yl)propan-1-one (3b)**

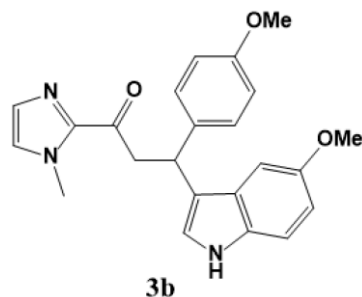

Following the general procedure A: **1b** (96.9 mg, 0.40 mmol), **2b** (294.4 mg, 2.0 mmol), Cu(NO<sub>3</sub>)<sub>2</sub>·3H<sub>2</sub>O (193 mg, 0.80 mmol). The title compound (molecular formula: C<sub>23</sub>H<sub>23</sub>N<sub>3</sub>O<sub>3</sub>, MW = 389.46 g/mol, 133.0 mg) was isolated as a brown solid in 85% yield. <sup>1</sup>H NMR (CDCl<sub>3</sub>, 400 MHz): δ/ppm=3.70 (s, 3H), 3.75 (s, 3H), 3.82 (dd, *J*=8.3Hz, *J*=8.1Hz, 1H), 3.87 (s, 3H), 3.93 (dd, *J*=15.7 Hz, *J*=7.6 Hz, 1H), 4.94(t, *J*=7.5 Hz, 1H), 6.73-6.77 (m, 3H), 6.91 (s, 1H), 6.96 (s, 1H), 7.02 (s, 1H), 7.13-7.15 (m, 2H), 7.25(d, *J*=8.5 Hz, 2H). <sup>13</sup>C NMR (CDCl<sub>3</sub>, 100 MHz): δ/ppm=36.4 (q), 37.7 (d), 45.7 (t), 55.4 (q), 56.0 (q), 101.7 (d), 111.8 (d), 112.3 (d), 113.9 (d), 119.7 (s), 122.3 (d), 127.1 (s), 127.4 (d), 129.1 (d), 131.9 (s), 136.7 (s), 143.4 (s), 154.0 (s), 158.1 (s), 191.5 (s). HRMS (ESI) calcd. for C<sub>23</sub>H<sub>24</sub>N<sub>3</sub>O<sub>3</sub>: 390.1818 ([M+H]<sup>+</sup>, found 390.1809 ([M+H]<sup>+</sup>).

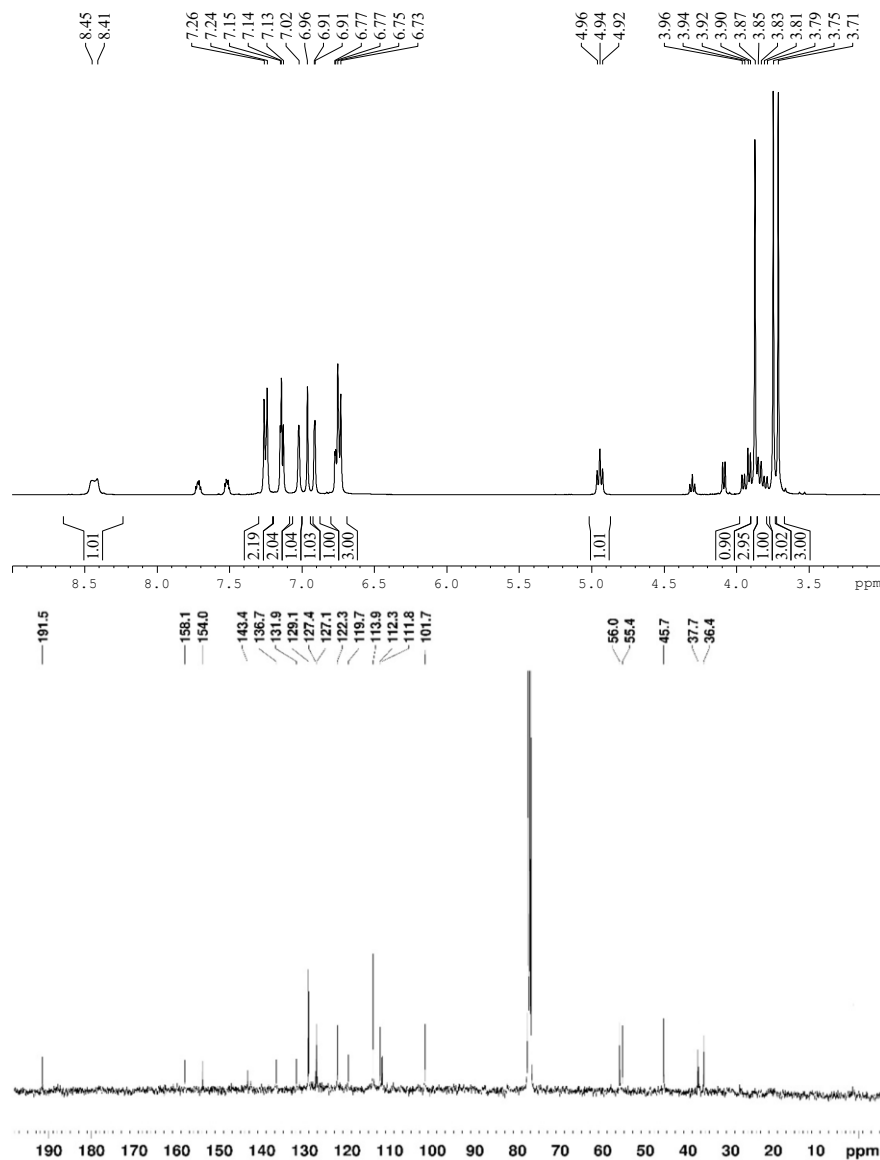

### 3-(2-Bromophenyl)-1-(1-methyl-1H-imidazol-2-yl)-3-(1-methyl-1H-indol-3yl)propan-1-one (3c)

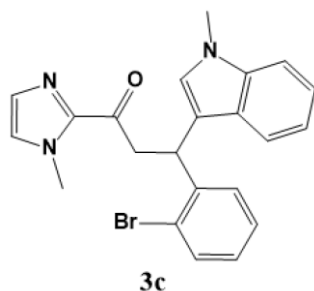

Following the general procedure A: **1c** (116.5 mg, 0.40 mmol), **2a** (262.4 mg, 2.0 mmol), Cu(NO<sub>3</sub>)<sub>2</sub>·3H<sub>2</sub>O (193 mg, 0.80 mmol). The title compound (molecular formula: C<sub>22</sub>H<sub>20</sub>N<sub>3</sub>OBr, MW = 422.33 g/mol, 93.0 mg) was isolated as a brown solid in 55% yield. <sup>1</sup>H NMR (CDCl<sub>3</sub>, 400 MHz): δ/ppm=3.57 (dd, *J* = 5.6 Hz, *J* = 10.6 Hz, 1H), 3.72 (s, 3H), 3.94 (s, 3H), 4.23 (dd, *J* = 9.0 Hz, *J* = 7.6 Hz, 1H), 5.54 (dd, *J* = 6.0 Hz, *J* = 2.8 Hz, 1H), 7.02 (m, 4H), 7.14 (m, 3H), 7.24 (m, 1H), 7.28 (m, 1H), 7.52 (d, *J* = 7.9 Hz, 2H), 7.58 (dd, *J* = 1.2 Hz, *J* = 1.2 Hz, 1H). <sup>13</sup>C NMR (CDCl<sub>3</sub>, 100 MHz): δ/ppm= 33.0 (q), 36.4 (q), 37.4 (t), 44.7 (d), 109.2 (d), 116.8 (s), 119.1 (d), 120.0 (d), 121.9 (d), 124.4 (s), 126.9 (d), 127.2(d), 127.5 (s), 127.7 (d), 127.9 (d), 129.1 (d), 129.7 (d), 133.0 (d), 137.5 (s), 143.3 (s), 143.7 (s), 190.7 (s). HRMS (ESI) calcd. for C<sub>22</sub>H<sub>21</sub>N<sub>3</sub>OBr: 422.0868 ([M+H]<sup>+</sup>), found 422.0865 ([M+H]<sup>+</sup>).

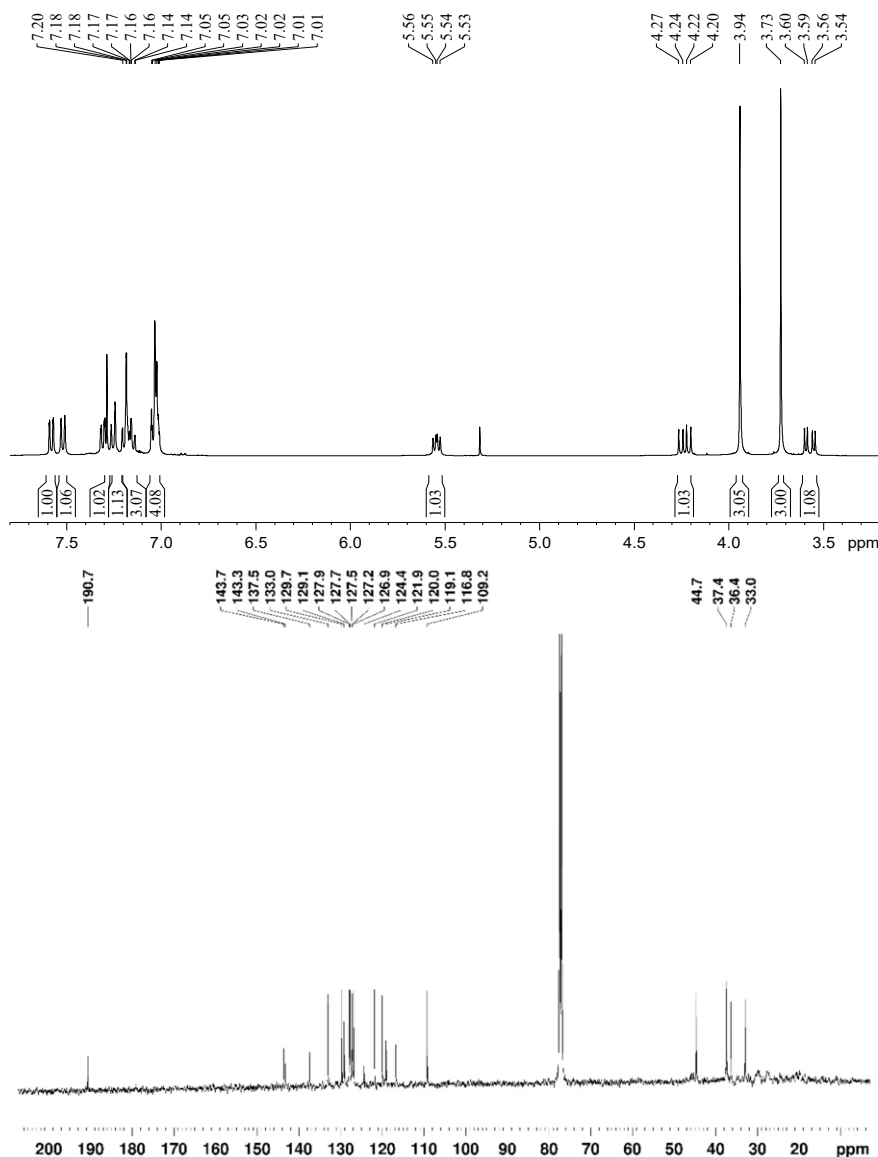

### 3-(5-Methoxy-1*H*-indol-3-yl)-1-(1-methyl-1*H*-imidazol-2-yl)butan-1-one (3d)

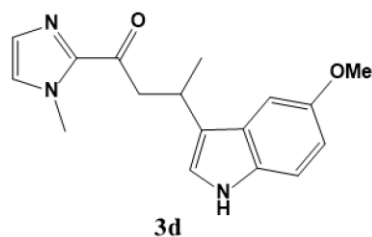

Following the general procedure A: **1d** (60.0 mg, 0.40 mmol), **2b** (294.4 mg, 2.0 mmol), Cu(NO<sub>3</sub>)<sub>2</sub>·3H<sub>2</sub>O (193 mg, 0.80 mmol). The title compound (molecular formula: C<sub>17</sub>H<sub>19</sub>N<sub>3</sub>O<sub>2</sub>, MW = 297.36 g/mol, 107.0 mg) was isolated as a brown solid in 90% yield. <sup>1</sup>H NMR (CDCl<sub>3</sub>, 400 MHz): δ/ppm=1.42 (d, *J* = 6.9 Hz, 3H), 3.41 (dd, *J* = 8.3 Hz, *J* = 15.6 Hz, 1H), 3.58 (dd, *J* = 6.2, *J* = 15.6 Hz, 1H), 3.77 – 3.83 (m, 1H), 3.88 (s, 3H), 3.95 (s, 3H), 6.83 (dd, *J* = 2.5 Hz, *J* = 8.8 Hz, 1H), 7.00 (s, 1H), 7.18-7.22 (m, 3H), 8.50 (s, 1H). <sup>13</sup>C NMR (CDCl<sub>3</sub>, 100 MHz): δ/ppm= 21.8 (q), 27.6 (q), 36.5 (d), 47.3 (q), 56.2 (t), 101.2 (d), 112.0 (d), 112.4 (d), 121.2 (d), 121.4 (d), 126.9 (s), 127.1 (d), 128.0 (s), 131.7 (s), 142.6 (s), 154.0 (s), 192.1 (s). HRMS (ESI) calcd. for C<sub>17</sub>H<sub>20</sub>N<sub>3</sub>O<sub>2</sub>: 298.1556 ([M+H]<sup>+</sup>), found 298.1559 ([M+H]<sup>+</sup>).

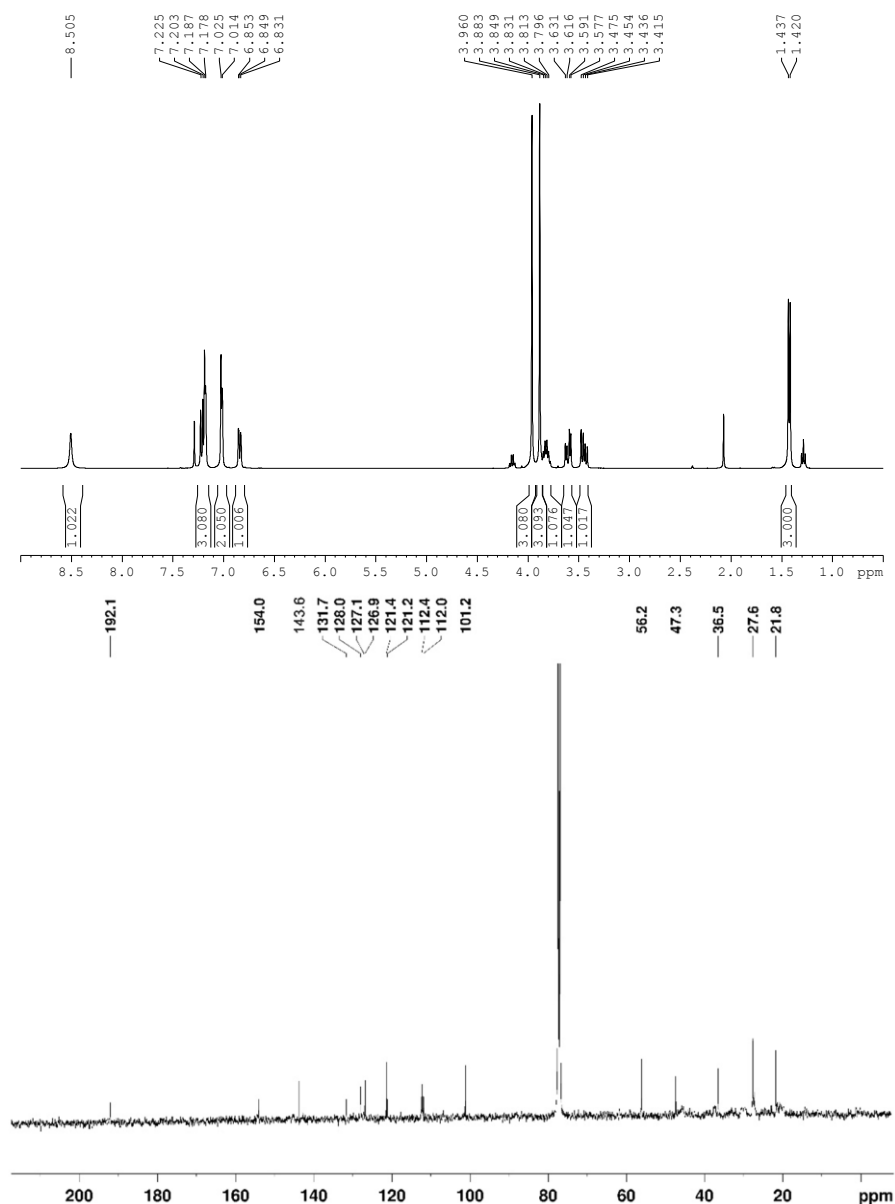

**3-(1*H*-indol-3-yl)-1-(1-methyl-1*H*-imidazol-2-yl)butan-1-one (3e)**

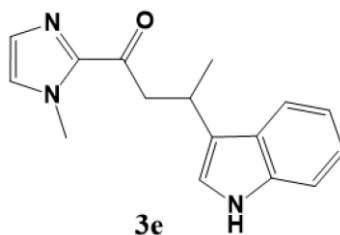

Following the general procedure A: **1d** (60.0 mg, 0.40 mmol), **2c** (234.3 mg, 2.0 mmol), Cu(NO<sub>3</sub>)<sub>2</sub>·3H<sub>2</sub>O (193 mg, 0.80 mmol). The title compound (molecular formula: C<sub>16</sub>H<sub>17</sub>N<sub>3</sub>O, MW = 267.33 g/mol, 80.0 mg) was isolated as a brown solid in 74% yield. <sup>1</sup>H NMR (CDCl<sub>3</sub>, 400 MHz): δ/ppm=1.40 (d, *J* = 6.9 Hz, 3H), 3.51 (m, 2H), 3.84 (m, 1H), 3.92 (s, 3H), 7.00 (t, *J* = 7.1 Hz, 2H), 7.07 (t, *J* = 8.2 Hz, 1H), 7.14(m, 2H), 7.30 (d, *J* = 8.1 Hz, 1H), 7.66 (d, *J* = 7.9 Hz, 1H), 8.42(s, 1H). <sup>13</sup>C NMR (CDCl<sub>3</sub>, 100 MHz): δ/ppm= 21.9 (q), 27.3 (t), 36.4 (d), 47.0 (q), 111.3 (d), 119.3 (d), 119.4 (d), 120.4 (d), 121.6 (s), 122.0 (d), 126.8 (s), 127.1 (d), 129.0 (d), 136.6 (s), 143.5 (s), 192.5 (s). HRMS (ESI) calcd. for C<sub>16</sub>H<sub>18</sub>N<sub>3</sub>O: 268.1450 ([M+H]<sup>+</sup>), found 268.1451 ([M+H]<sup>+</sup>).

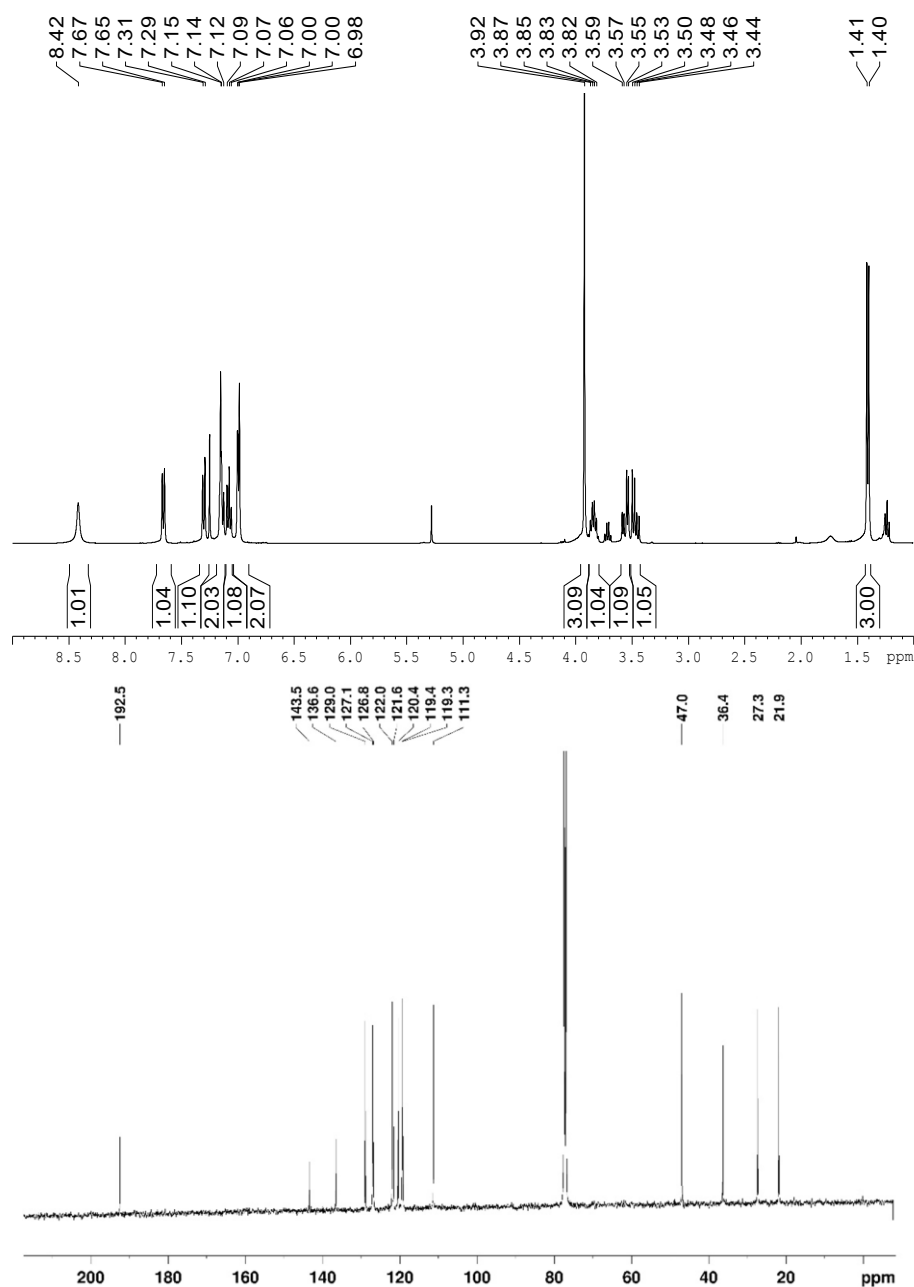

**1-(1-methyl-1*H*-imidazol-2-yl)-3-(1-methyl-1*H*-indol-3-yl)butan-1-one (3f)**

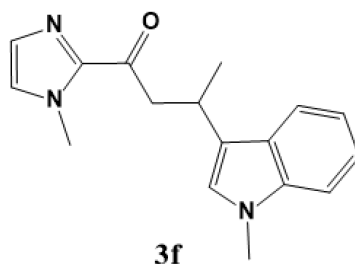

Following the general procedure A: **1d** (60.0 mg, 0.40 mmol), **2a** (262.4 mg, 2.0 mmol), Cu(NO<sub>3</sub>)<sub>2</sub>·3H<sub>2</sub>O (193 mg, 0.80 mmol). The title compound (molecular formula: C<sub>17</sub>H<sub>19</sub>N<sub>3</sub>O, MW = 281.36 g/mol, 99.0 mg) was isolated as a brown solid in 88% yield. <sup>1</sup>H NMR (CDCl<sub>3</sub>, 400 MHz): δ/ppm=1.41 (d, *J* = 6.9, 3H), 3.45 (dd, *J* = 2.2 Hz, *J* = 8.00 Hz, 1H), 3.60 (dd, *J* = 6.5 Hz, 1H), 3.72 (s, 3H), 3.83 (dd, *J* = 7.0 Hz, *J* = 7.2 Hz, 1H), 3.92 (s, 3H), 6.93 (s, 1H), 6.98 (s, 1H), 7.27 (s, 1H), 7.07 (m, 1H), 7.14 (s, 1H), 7.19 (t, *J* = 7.0 Hz, 1H), 7.24 (s, 1H), 7.65 (d, *J* = 7.7 Hz, 1H). <sup>13</sup>C NMR (CDCl<sub>3</sub>, 100 MHz): δ/ppm= 22.2 (q), 27.4 (d), 32.8 (q), 36.4 (q), 47.2 (t), 109.3 (d), 118.8 (d), 119.6 (d), 121.6 (d), 125.4 (d), 126.9 (d), 128.8 (d), 137.2 (s), 143.5 (s), 192.4 (s). HRMS (ESI) calcd. for C<sub>17</sub>H<sub>20</sub>N<sub>3</sub>O: 282.1606 ([M+H])<sup>+</sup>, found 282.1601 ([M+H])<sup>+</sup>.

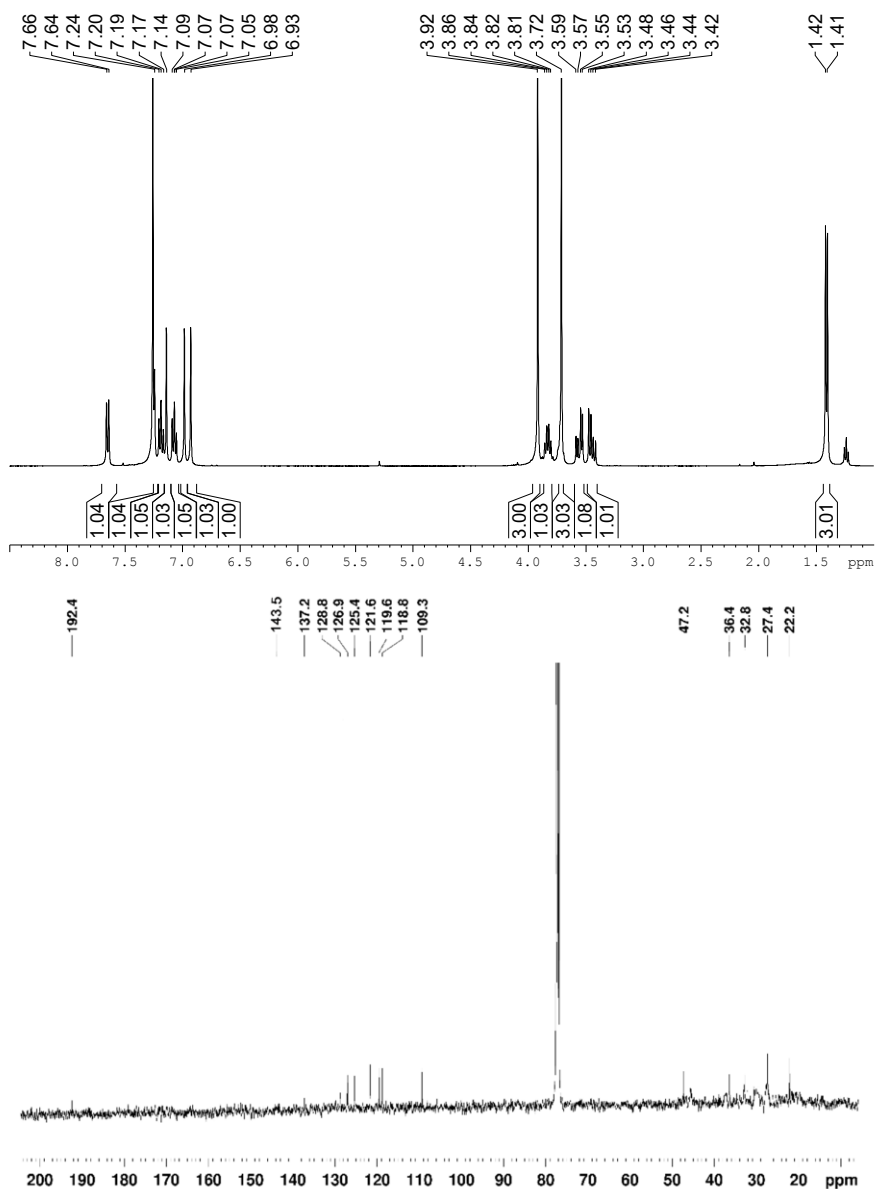

**3-(5-chloro-1H-indol-3-yl)-1-(1-methyl-1H-imidazol-2-yl)butan-1-one (3g)**

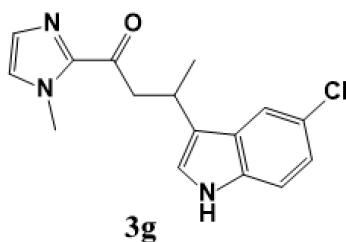

Following the general procedure A: **1d** (60.0 mg, 0.40 mmol), **2d** (303.2 mg, 2.0 mmol), Cu(NO<sub>3</sub>)<sub>2</sub>·3H<sub>2</sub>O (193 mg, 0.80 mmol). The title compound (molecular formula: C<sub>17</sub>H<sub>18</sub>ClN<sub>3</sub>O, MW = 315.80 g/mol, 91.0 mg) was isolated as a brown solid in 72% yield. <sup>1</sup>H NMR (CDCl<sub>3</sub>, 400 MHz): δ/ppm=1.40 (d, *J* = 6.9 Hz, 3H), 3.47 (m, 2H), 3.77 (m, 1H), 3.92 (s, 3H), 7.01 (s, 1H), 7.08(d, *J* = 9.5 Hz, 2H), 7.16 (s, 1H), 7.21 (d, *J* = 8.6Hz, 2H), 7.54 (s, 1H). <sup>13</sup>C NMR (CDCl<sub>3</sub>, 100 MHz): δ/ppm= 21.8 (q), 27.4 (d), 36.4 (q), 47.3 (t), 112.3 (d), 118.9 (d), 121.4 (s), 121.9 (d), 122.3 (d), 125.1 (s), 127.1 (d), 127.9 (s), 128.7 (d), 134.9 (s), 143.1 (s), 192.0 (s). HRMS (ESI) calcd. for C<sub>17</sub>H<sub>19</sub>ClN<sub>3</sub>O: 302.1060 ([M+H]<sup>+</sup>), found 302.1056 ([M+H]<sup>+</sup>).

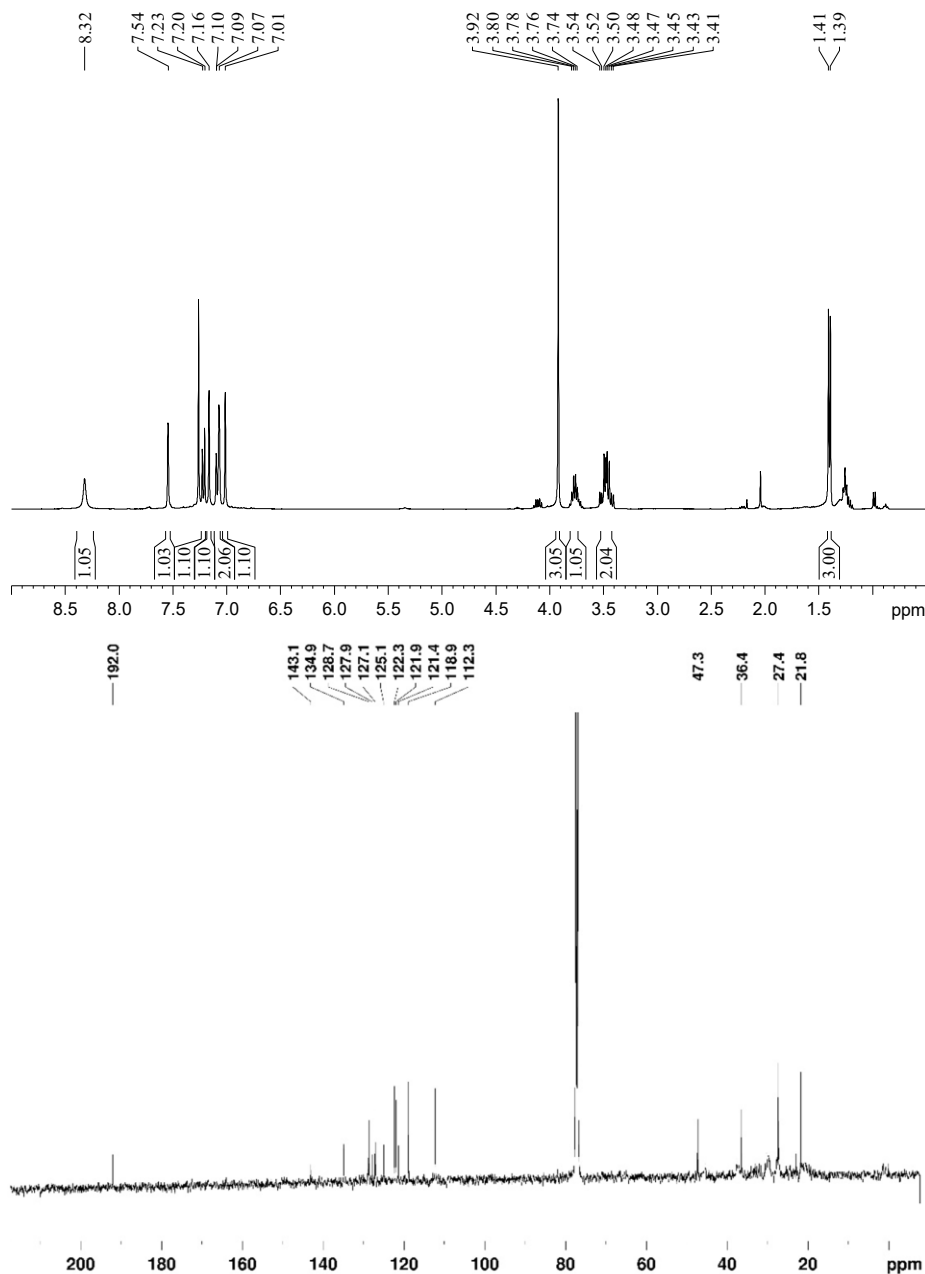

## Preparation and HPLC analysis of enantioselective Friedel-Crafts alkylation products 3a-3g

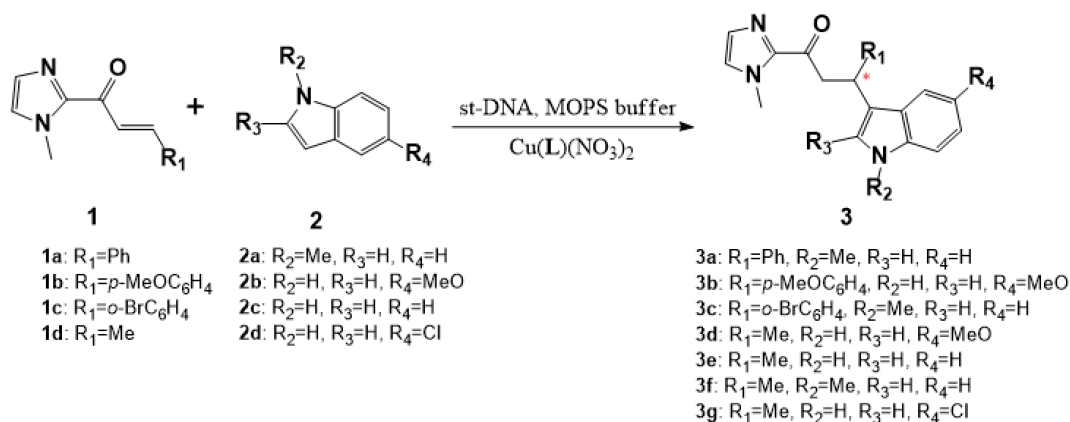

### Preparation of a 0.9 mM stock solution of [Py<sub>4</sub>-dmbpy-Cu<sup>2+</sup>]

To a solution of **Py<sub>4</sub>-dmbpy** (294.5 mg, 0.41 mmol) in methanol was added Cu(NO<sub>3</sub>)<sub>2</sub>·3H<sub>2</sub>O (100.0 mg, 0.41 mmol), dissolved in methanol. The solution was stirred for 24 h. The bright green solid was filtered and washed with methanol. Yield: 213.43 mg, 59%.

### General procedure B

To a 3 mM base pair solution of DNA in a 30 mM MOPS buffer (10 mL, prepared 24 h in advance) was added a 0.9 mM solution of **Py<sub>4</sub>-dmbpy-Cu<sup>II</sup>** or **dmbpy-Cu<sup>II</sup>** in a 5 mL ultrapure water. The resulting DNA solution (2 mM base pair, 15 mL) was cooled to 5 °C. To the cold mixture was added a 0.75 M solution of enone in DMSO (20 μL), followed by a 3.75 M solution of substituted indole in DMSO (20 μL). The reaction was stirred at 5 °C. After 10 h, the mixture was warmed to r.t. and extracted with Et<sub>2</sub>O (3×15 mL). The combined organic layers were dried over Na<sub>2</sub>SO<sub>4</sub>, filtered through a plug of silica gel and concentrated under reduced pressure, to give the crude product which was subjected to HPLC analysis without further purification.

### HPLC figure caption

- standard sample of start materials **1**.
- racemic products **3** catalyzed by Cu(NO<sub>3</sub>)<sub>2</sub>, were purified as standards.
- Friedel-Crafts reaction catalyzed by st-DNA/**Py<sub>4</sub>-dmbpy-Cu<sup>II</sup>**.

### Calculation formula of the conversion

Conversions of **1** were calculated using the following formula<sup>[1,2]</sup>:

$$\text{Conv. (\%)} = \frac{A(3)}{A(3) + A(1) \times f} \times 100\%$$

Where **A(3)** is the total peak area of the products of the reaction, **A(1)** is the peak area of the starting material ( $\alpha$ ,  $\beta$ -unsaturated substrates) and **f** is the correction factor determined from a calibration curve, and the results are shown in Table S1.

**Table S1.** The correction factor  $f$  of products **3a-g**.

| Entry | Starting materials | Products  | $f$    | $R^2$  |
|-------|--------------------|-----------|--------|--------|
| 1     | <b>1a</b>          | <b>3a</b> | 0.1735 | 0.9907 |
| 2     | <b>1b</b>          | <b>3b</b> | 0.3849 | 0.9945 |
| 3     | <b>1c</b>          | <b>3c</b> | 1.4153 | 0.9521 |
| 4     | <b>1d</b>          | <b>3d</b> | 0.8735 | 0.9807 |
| 5     | <b>1d</b>          | <b>3e</b> | 0.3180 | 0.9946 |
| 6     | <b>1d</b>          | <b>3f</b> | 0.6593 | 0.9895 |
| 7     | <b>1d</b>          | <b>3g</b> | 0.5201 | 0.9937 |

Take the correction factor  $f$  of **3a** as an example:

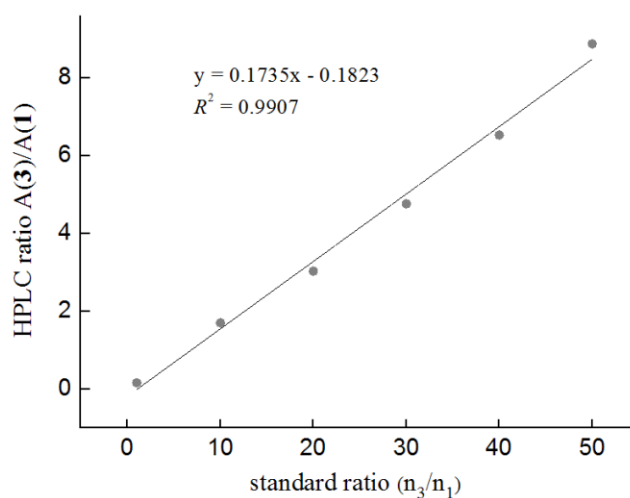

The HPLC ratios of peak areas  $A(3)/A(1)$  were determined with the standard molar ratios ( $n_3/n_1$ ) of 1, 10, 20, 30, 40, 50. The correction factor ( $f = 0.1735$ ) was estimated from the fitting curve ( $R^2 = 0.9907$ ). The HPLC chromatograms of the various molar ratios ( $n_3/n_1$ ) are shown below.

1:1 mixture of products **3a** and substrate **1a**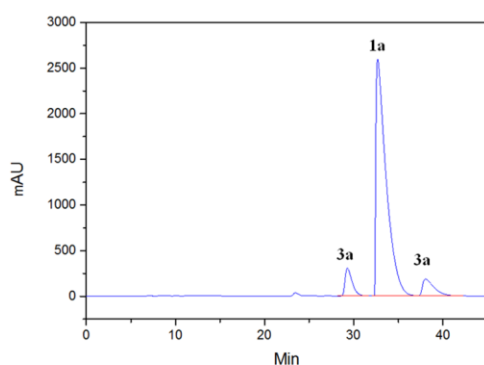

| Index | Name      | Time (min) | Area (%) |
|-------|-----------|------------|----------|
| 1     | <b>3a</b> | 29.302     | 7.044    |
| 2     | <b>1a</b> | 32.690     | 85.919   |
| 3     | <b>3a</b> | 38.066     | 7.037    |
| Total |           |            | 100      |

10:1 mixture of products **3a** and substrate **1a**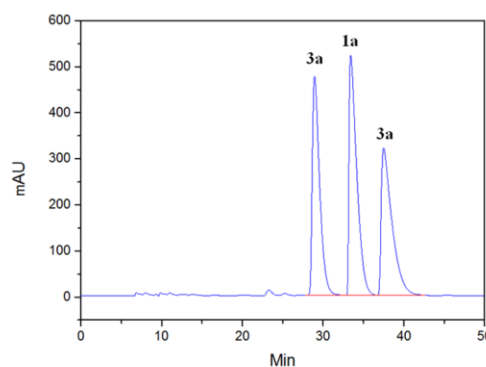

| Index | Name      | Time (min) | Area (%) |
|-------|-----------|------------|----------|
| 1     | <b>3a</b> | 28.946     | 31.742   |
| 2     | <b>1a</b> | 33.426     | 36.911   |
| 3     | <b>3a</b> | 37.509     | 31.346   |
| Total |           |            | 100      |



20:1 mixture of products **3a** and substrate **1a**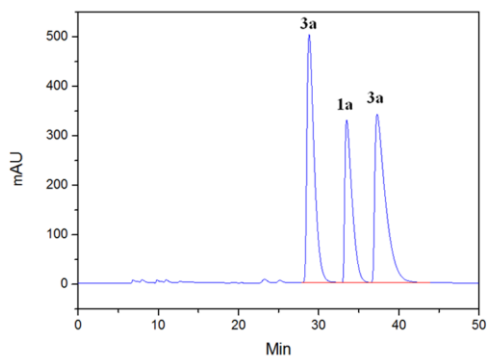

| Index | Name      | Time (min) | Area (%) |
|-------|-----------|------------|----------|
| 1     | <b>3a</b> | 28.817     | 37.622   |
| 2     | <b>1a</b> | 33.468     | 24.766   |
| 3     | <b>3a</b> | 37.302     | 37.612   |
| Total |           |            | 100      |

30:1 mixture of products **3a** and substrate **1a**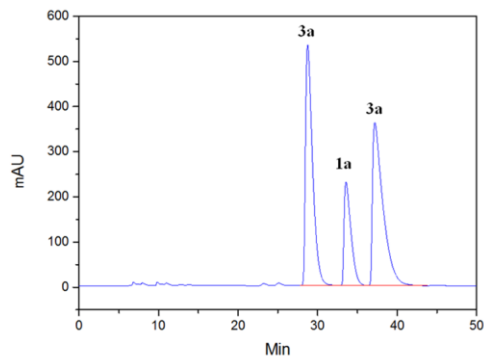

| Index | Name      | Time (min) | Area (%) |
|-------|-----------|------------|----------|
| 1     | <b>3a</b> | 28.750     | 41.304   |
| 2     | <b>1a</b> | 33.571     | 17.340   |
| 3     | <b>3a</b> | 37.200     | 41.357   |
| Total |           |            | 100      |

40:1 mixture of products **3a** and substrate **1a**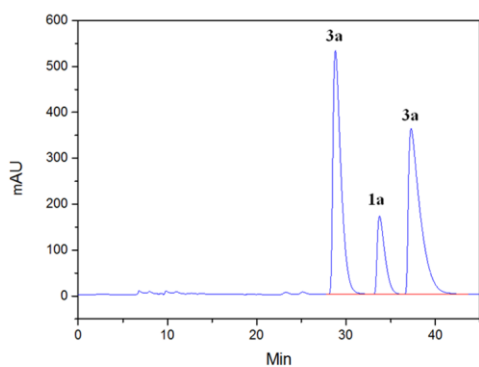

| Index | Name      | Time (min) | Area (%) |
|-------|-----------|------------|----------|
| 1     | <b>3a</b> | 28.812     | 43.320   |
| 2     | <b>1a</b> | 33.752     | 13.270   |
| 3     | <b>3a</b> | 37.286     | 43.410   |
| Total |           |            | 100      |

50:1 mixture of products **3a** and substrate **1a**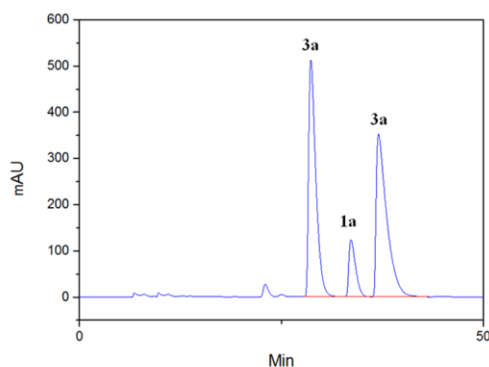

| Index | Name      | Time (min) | Area (%) |
|-------|-----------|------------|----------|
| 1     | <b>3a</b> | 28.635     | 44.891   |
| 2     | <b>1a</b> | 33.602     | 10.118   |
| 3     | <b>3a</b> | 37.014     | 44.991   |
| Total |           |            | 100      |

### 1-(1-methyl-1*H*-imidazol-2-yl)-3-(1-methyl-1*H*-indol-3-yl)-3-phenylpropan-1-one (3a)

Following the general procedure B: st-DNA (2 mM base pair), **1a** (1 mM), **2a** (5 mM), Py<sub>4</sub>-dmbpy-Cu<sup>II</sup> (0.3 mM) and MOPS buffer (20 mM, pH 6.5); HPLC analysis of the crude residue indicated an enantiomeric excess of (+)17%. Daicel Chiralcel OD-H column; hexane/iPrOH 85:15, flow: 0.5 mL/min.;  $\lambda = 254$  nm]. Retention times: major enantiomer  $t_R = 27.963$  min; minor enantiomer  $t_R = 35.901$  min.

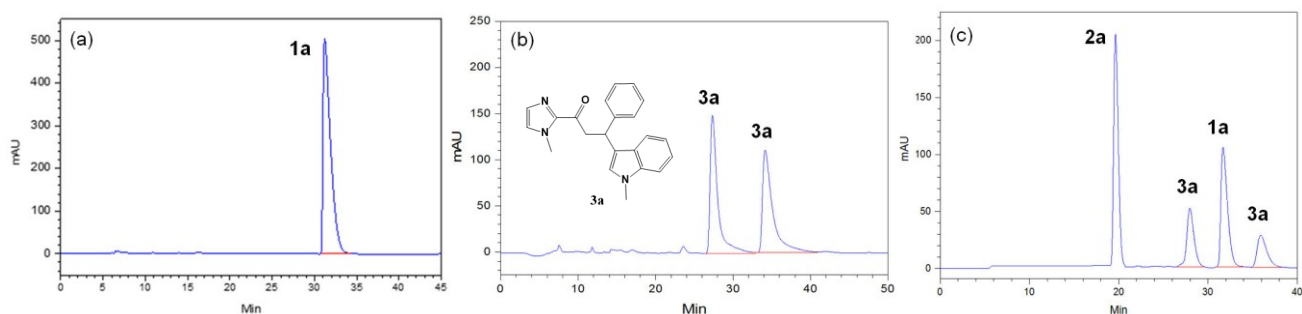

| Index | Retention time (min) | Compound  | Area   | ee (%) | Conversion (%) |
|-------|----------------------|-----------|--------|--------|----------------|
| 1     | 27.963               | <b>3a</b> | 2989.6 |        |                |
| 2     | 31.688               | <b>1a</b> | 5402.4 | 17     | 84             |
| 3     | 35.901               | <b>3a</b> | 2104.5 |        |                |

### 3-(5-methoxy-1*H*-indol-3-yl)-3-(4-methoxyphenyl)-1-(1-methyl-1*H*-imidazol-2-yl) propan-1-one (3b)

Following the general procedure B: st-DNA (2 mM base pair), **1b** (1 mM), **2b** (5 mM), Py<sub>4</sub>-dmbpy-Cu<sup>II</sup> (0.3 mM) and MOPS buffer (20 mM, pH 6.5); HPLC analysis of the crude residue indicated an enantiomeric excess of (-)8.0%. Daicel Chiralcel OD-H column; hexane/iPrOH 80:20, flow: 0.5 mL/min.;  $\lambda = 254$  nm. Retention times: major enantiomer  $t_R = 45.581$  min; minor enantiomer  $t_R = 41.917$  min.

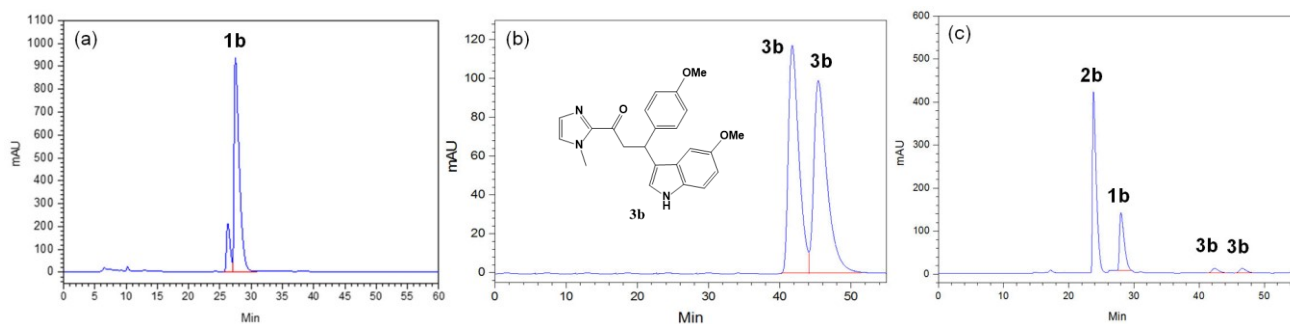

| Index | Retention time(min) | Compound  | Area    | ee (%) | Conversion(%) |
|-------|---------------------|-----------|---------|--------|---------------|
| 1     | 28.009              | <b>1b</b> | 17280.5 |        |               |
| 2     | 41.917              | <b>3b</b> | 1052.3  | -8     | 26            |
| 3     | 45.581              | <b>3b</b> | 1235.5  |        |               |

### 3-(2-Bromophenyl)-1-(1-methyl-1H-imidazol-2-yl)-3-(1-methyl-1H-indol-3-yl) propan-1-one (3c)

Following the general procedure B: st-DNA (2 mM base pair), **1c** (1 mM), **2a** (5 mM), **Py<sub>4</sub>-dmbpy-Cu<sup>II</sup>** (0.3 mM) and MOPS buffer (20 mM, pH 6.5); HPLC analysis of the crude residue indicated an enantiomeric excess of (-)32%. Daicel Chiralcel AD-H column; hexane/iPrOH 90:10, flow: 1.0 mL/min.;  $\lambda = 254$  nm. Retention times: major enantiomer  $t_R = 21.938$  min; minor enantiomer  $t_R = 16.937$  min.

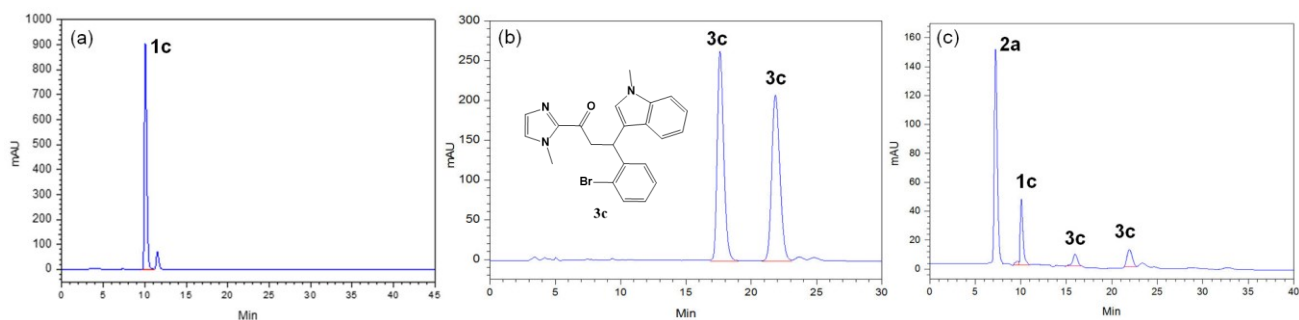

| Index | Retention time(min) | Compound  | Area   | ee (%) | Conversion(%) |
|-------|---------------------|-----------|--------|--------|---------------|
| 1     | 10.072              | <b>1c</b> | 1114.6 |        |               |
| 2     | 16.937              | <b>3c</b> | 283.5  | -32    | 34            |
| 3     | 21.938              | <b>3c</b> | 545.1  |        |               |

### 3-(5-Methoxy-1H-indol-3-yl)-1-(1-methyl-1H-imidazol-2-yl) butan-1-one (3d)

Following the general procedure B: st-DNA (2 mM base pair), **1d** (1 mM), **2b** (5 mM), **Py<sub>4</sub>-dmbpy-Cu<sup>II</sup>** (0.3 mM) and MOPS buffer (20 mM, pH 6.5); HPLC analysis of the crude residue indicated an enantiomeric excess of (-)15.0%. Daicel Chiralcel OD-H column; hexane/iPrOH 90:10, flow: 1.0 mL/min.;  $\lambda = 254$  nm. Retention times: major enantiomer  $t_R = 41.177$  min; minor enantiomer  $t_R = 34.240$  min.

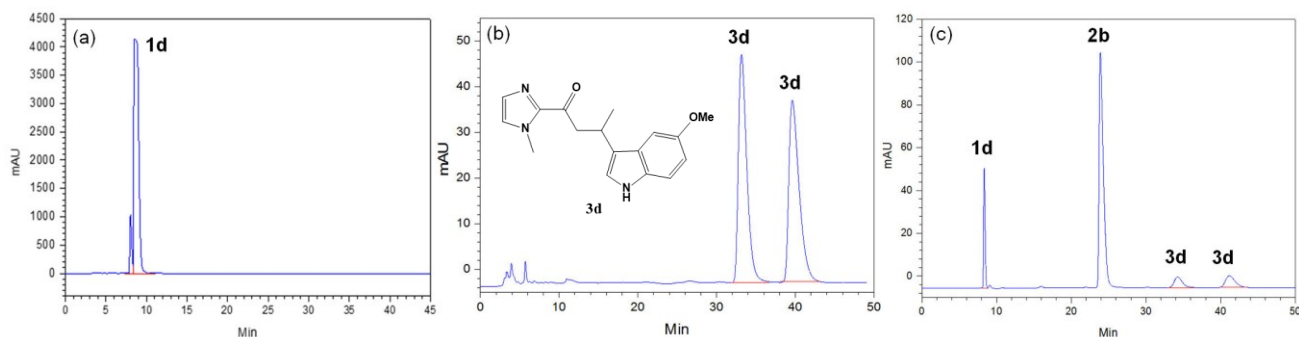

| Index | Retention time(min) | Compound  | Area   | ee (%) | Conversion(%) |
|-------|---------------------|-----------|--------|--------|---------------|
| 1     | 10.072              | <b>1d</b> | 1114.6 |        |               |
| 2     | 16.937              | <b>3c</b> | 283.5  | -32    | 34            |
| 3     | 21.938              | <b>3c</b> | 545.1  |        |               |

|   |        |           |       |     |    |
|---|--------|-----------|-------|-----|----|
| 1 | 8.355  | <b>1d</b> | 792.6 |     |    |
| 2 | 34.240 | <b>3d</b> | 358.0 | -15 | 55 |
| 3 | 41.177 | <b>3d</b> | 480.4 |     |    |

### 3-(1*H*-indol-3-yl)-1-(1-methyl-1*H*-imidazol-2-yl)butan-1-one (3e)

Following the general procedure B: st-DNA (2 mM base pair), **1d** (1 mM), **2c** (5 mM), **Py<sub>4</sub>-dmbpy-Cu<sup>II</sup>** (0.3 mM) and MOPS buffer (20 mM, pH 6.5); HPLC analysis of the crude residue indicated an enantiomeric excess of (-)17%. Daicel Chiralcel OD-H column; hexane/iPrOH 80:20, flow: 0.5 mL/min.;  $\lambda = 254$  nm. Retention times: major enantiomer  $t_R = 27.409$  min; minor enantiomer  $t_R = 24.884$  min.

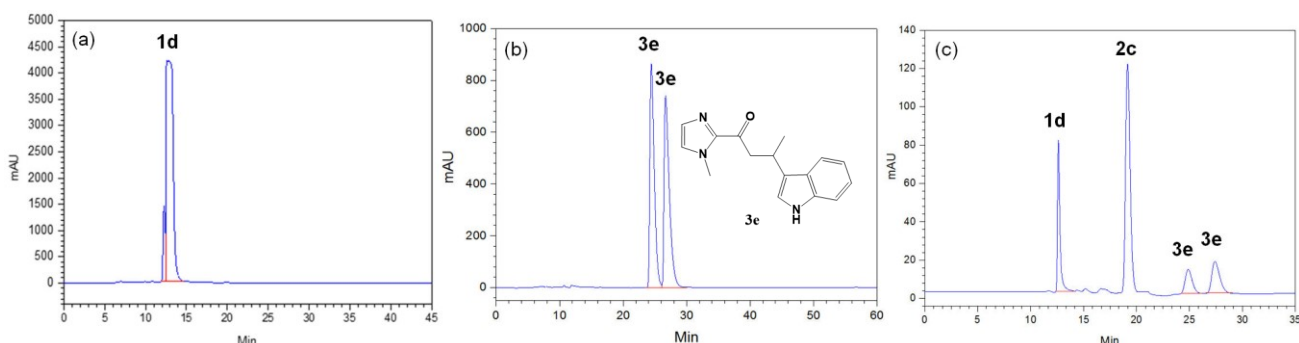

| Index | Retention time(min) | Compound  | Area   | ee (%) | Conversion(%) |
|-------|---------------------|-----------|--------|--------|---------------|
| 1     | 12.622              | <b>1d</b> | 1944.8 |        |               |
| 2     | 24.884              | <b>3e</b> | 618.2  | -17.3  | 71            |
| 3     | 27.409              | <b>3e</b> | 876.9  |        |               |

### 1-(1-methyl-1*H*-imidazol-2-yl)-3-(1-methyl-1*H*-indol-3-yl) butan-1-one (3f)

Following the general procedure B: st-DNA (2 mM base pair), **1d** (1 mM), **2a** (5 mM), **Py<sub>4</sub>-dmbpy-Cu<sup>II</sup>** (0.3 mM) and MOPS buffer (20 mM, pH 6.5); HPLC analysis of the crude residue indicated an enantiomeric excess of (-)21%. Daicel Chiralcel OD-H column; hexane/iPrOH 80:20, flow: 0.5 mL/min.;  $\lambda = 254$  nm. Retention times: major enantiomer  $t_R = 23.709$  min; minor enantiomer  $t_R = 21.838$  min.

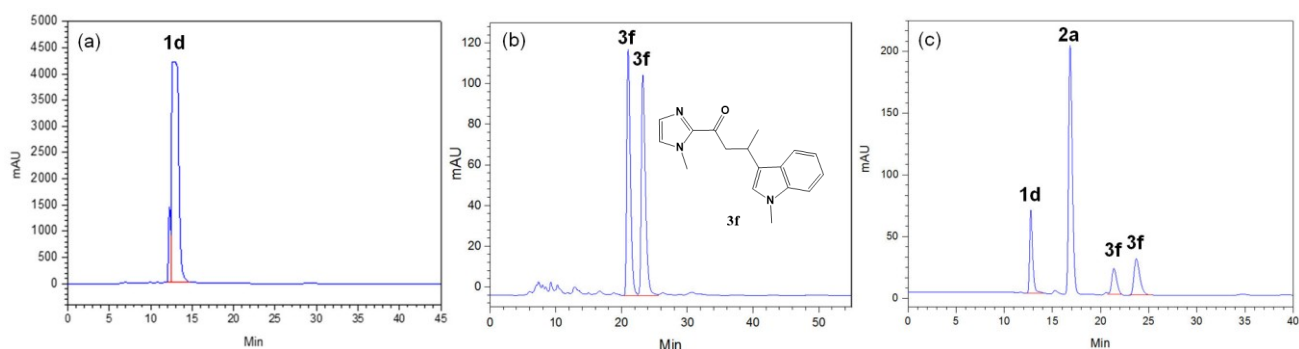

| Index | Retention time(min) | Compound  | Area   | ee (%) | Conversion(%) |
|-------|---------------------|-----------|--------|--------|---------------|
| 1     | 12.755              | <b>1d</b> | 1482.2 |        |               |
| 2     | 21.838              | <b>3f</b> | 816.7  | -21.4  | 68            |
| 3     | 23.709              | <b>3f</b> | 1262.4 |        |               |

### **3-(5-chloro-1H-indol-3-yl)-1-(1-methyl-1H-imidazol-2-yl)butan-1-one (3g)**

Following the general procedure B: st-DNA (2 mM base pair), **1d** (1 mM), **2d** (5 mM), **Py<sub>4</sub>-dmbpy-Cu<sup>II</sup>** (0.3 mM) and MOPS buffer (20 mM, pH 6.5); HPLC analysis of the crude residue indicated an enantiomeric excess of (-)32.0%. Daicel Chiralcel AD-H column; hexane/iPrOH 90:10, flow: 1.0 mL/min.;  $\lambda = 254$  nm. Retention times: major enantiomer  $t_R = 33.066$  min; minor enantiomer  $t_R = 25.090$  min.

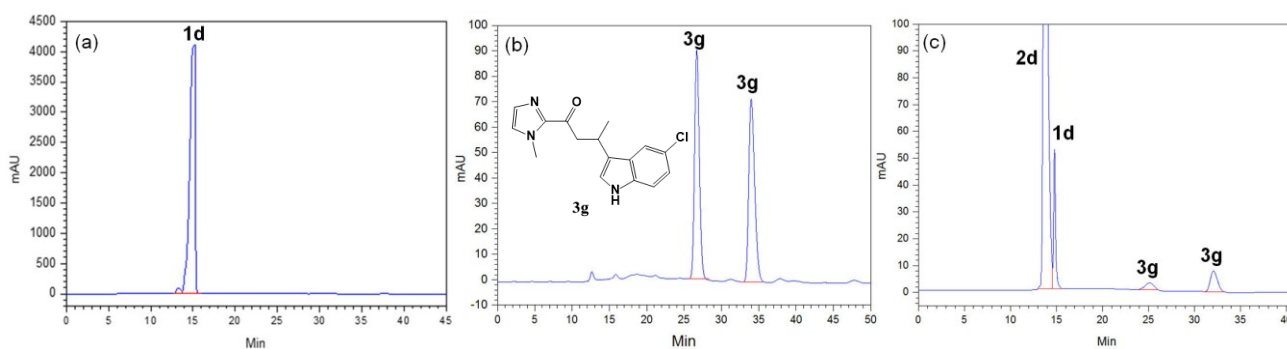

| Index    | Retention time(min) | Compound  | Area  | ee (%) | Conversion(%) |
|----------|---------------------|-----------|-------|--------|---------------|
| <b>1</b> | 14.798              | <b>1d</b> | 822.9 |        |               |
| <b>2</b> | 25.090              | <b>3g</b> | 224.6 | -31.6  | 61            |
| <b>3</b> | 33.066              | <b>3g</b> | 432.3 |        |               |

## HPLC analysis of product 3d catalyzed by oligonucleotides/Py<sub>4</sub>-dmbpy-Cu<sup>II</sup>

**ODN: d(GACTGACTAGTCAGTC)<sub>2</sub>**

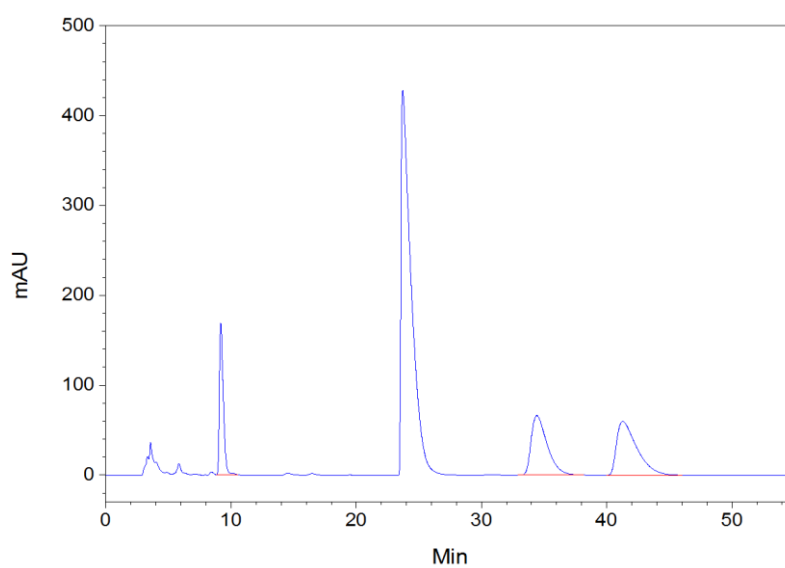

| Index | Retention time (min) | Compound | Area   | ee (%) | Conversion (%) |
|-------|----------------------|----------|--------|--------|----------------|
| 1     | 9.179                | 1d       | 3681.7 |        |                |
| 2     | 34.417               | 3d       | 5840.9 | -7     | 80             |
| 3     | 41.276               | 3d       | 6667.6 |        |                |

**ODN: d(TCAGGGCCCTGA)<sub>2</sub>**

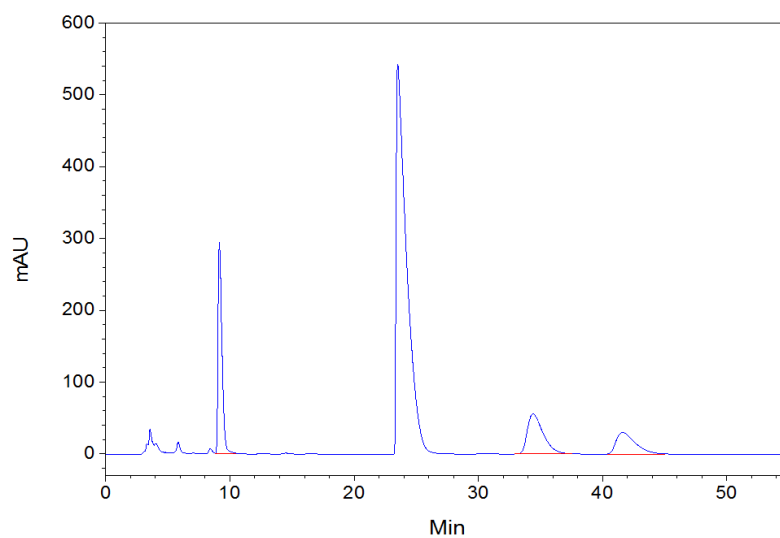

| Index | Retention time (min) | Compound | Area   | <i>ee</i> (%) | Conversion (%) |
|-------|----------------------|----------|--------|---------------|----------------|
| 1     | 9.155                | 1d       | 6516.7 |               |                |
| 2     | 34.395               | 3d       | 4917.9 | 20            | 57             |
| 3     | 41.602               | 3d       | 2651.9 |               |                |

**ODN: d(TCGGGGCCCGA)<sub>2</sub>**

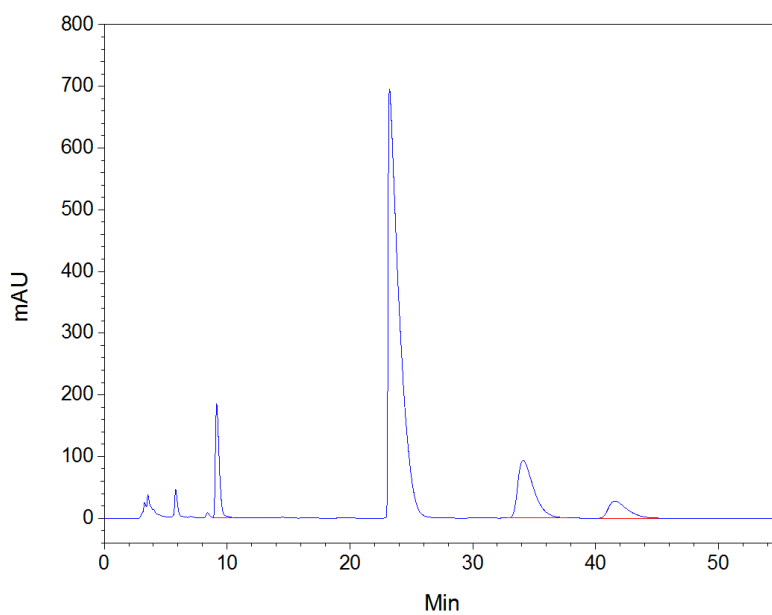

| Index | Retention time (min) | Compound | Area   | <i>ee</i> (%) | Conversion (%) |
|-------|----------------------|----------|--------|---------------|----------------|
| 1     | 9.152                | 1d       | 4039.4 |               |                |
| 2     | 34.101               | 3d       | 8275.5 | 48            | 76             |
| 3     | 41.567               | 3d       | 2913.3 |               |                |

**ODN: d(TCGGAATCCGA)<sub>2</sub>**

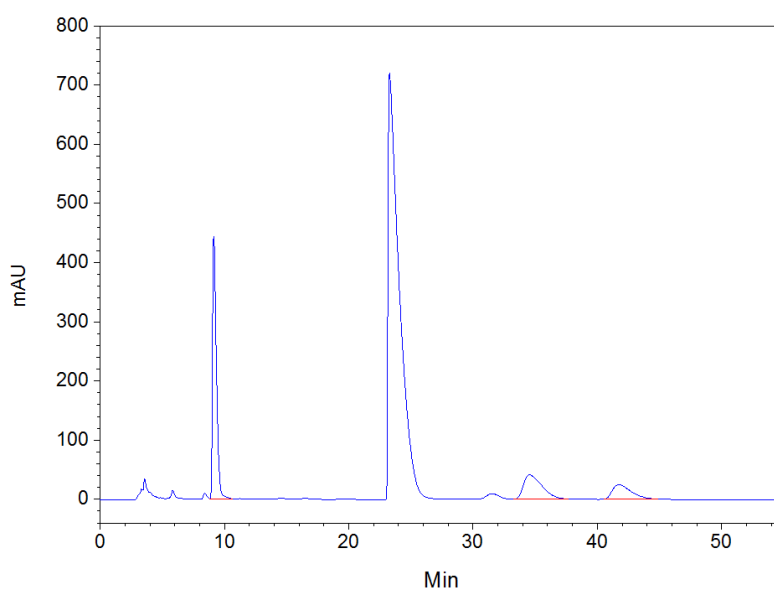

| Index | Retention time (min) | Compound | Area   | ee (%) | Conversion (%) |
|-------|----------------------|----------|--------|--------|----------------|
| 1     | 9.139                | 1d       | 9882.2 |        |                |
| 2     | 34.533               | 3d       | 4271.0 | 23.3   | 45             |
| 3     | 41.736               | 3d       | 2651.9 |        |                |

**ODN: d(TCAGTGCACTGA)<sub>2</sub>**

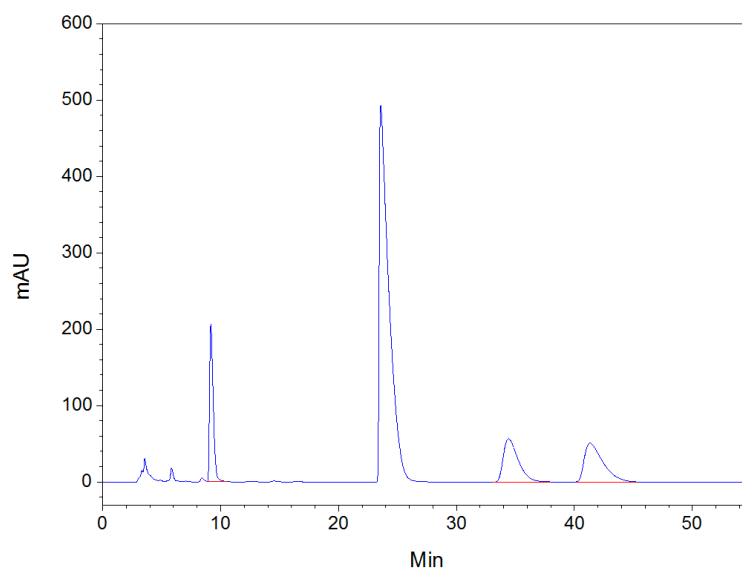

| Index | Retention time (min) | Compound | Area   | ee (%) | Conversion (%) |
|-------|----------------------|----------|--------|--------|----------------|
| 1     | 9.165                | 1d       | 4475.0 | 6      | 73             |
| 2     | 34.416               | 3d       | 4907.4 |        |                |



|   |        |    |        |
|---|--------|----|--------|
| 3 | 41.321 | 3d | 5534.6 |
|---|--------|----|--------|

**ODN: d(GCATGATCATGC)<sub>2</sub>**

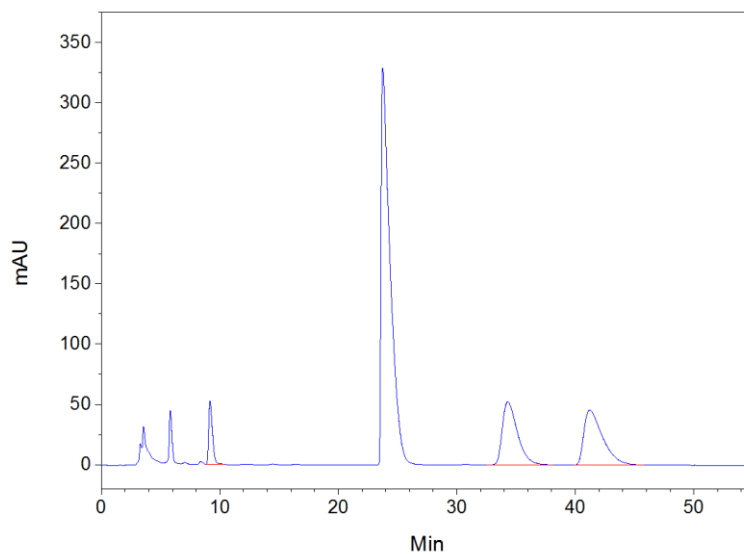

| Index | Retention time (min) | Compound | Area   | ee (%) | Conversion (%) |
|-------|----------------------|----------|--------|--------|----------------|
| 1     | 9.170                | 1d       | 1188.9 |        |                |
| 2     | 34.293               | 3d       | 4135.4 | -13    | 90             |
| 3     | 41.216               | 3d       | 5310.9 |        |                |

**ODN: d(GCGCGCGCGCGC)<sub>2</sub>**

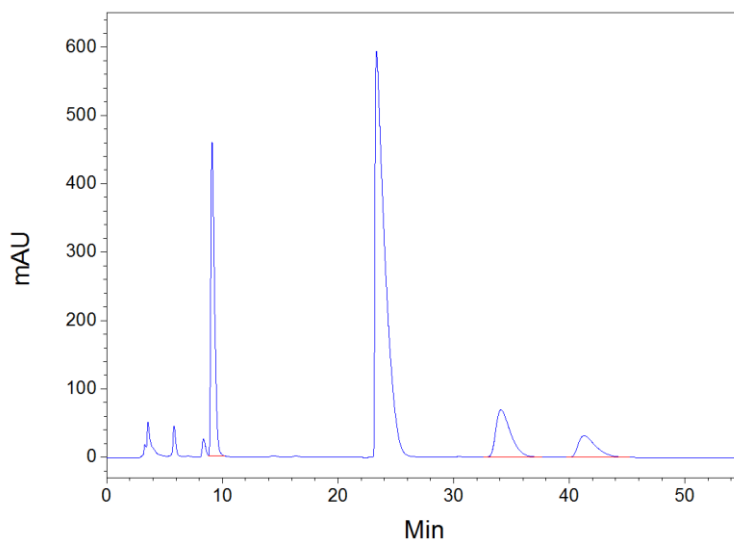

| Index | Retention time (min) | Compound | Area    | <i>ee</i> (%) | Conversion (%) |
|-------|----------------------|----------|---------|---------------|----------------|
| 1     | 9.101                | 1d       | 10359.1 |               |                |
| 2     | 34.09                | 3d       | 6079.6  | 29.0          | 51             |
| 3     | 41.277               | 3d       | 3345.3  |               |                |

**ODN: d(ATATATATATAT)<sub>2</sub>**

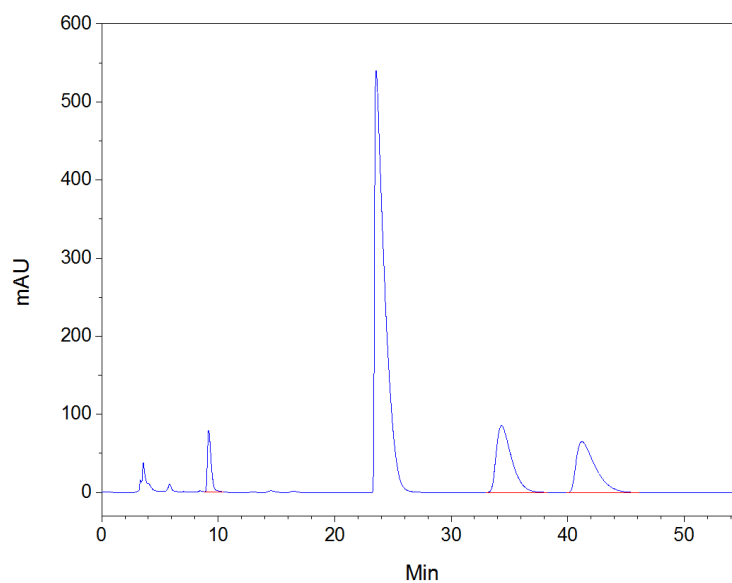

| Index | Retention time (min) | Compound | Area   | <i>ee</i> (%) | Conversion (%) |
|-------|----------------------|----------|--------|---------------|----------------|
| 1     | 9.185                | 1d       | 1792.1 |               |                |
| 2     | 34.316               | 3d       | 7781.2 | -2.5          | 91             |
| 3     | 41.222               | 3d       | 7397.7 |               |                |

**Basis spectra of SVD analysis**

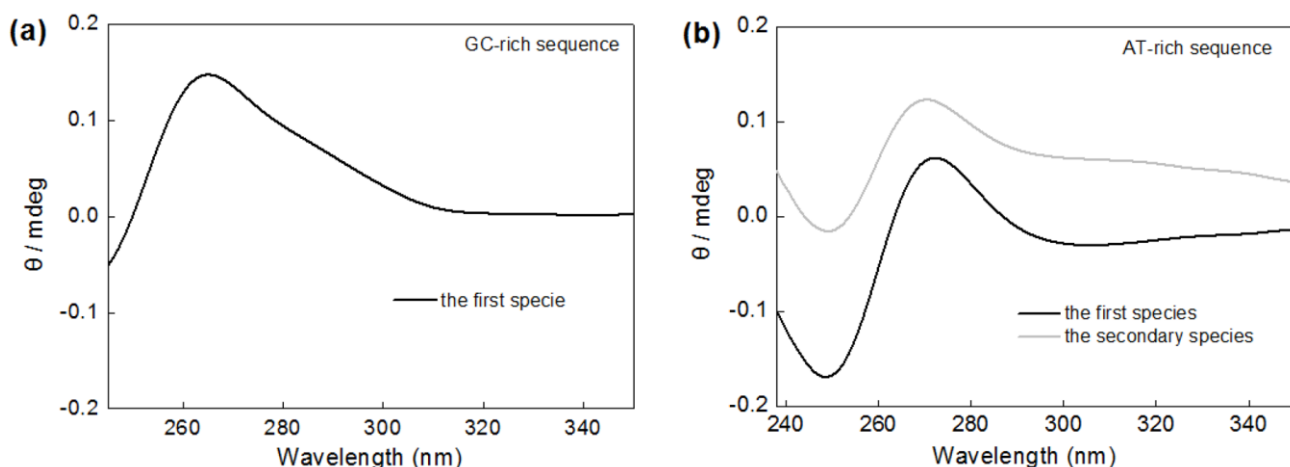

**Fig. S1** Basis spectra produced by SVD analysis of (a)  $\text{Py}_4\text{-dmbpy-Cu}^{\text{II}}$ /GC-rich ODN  $\text{d}(\text{TCGGGGCCCCGA})_2$  and (B)  $\text{Py}_4\text{-dmbpy-Cu}^{\text{II}}$ /AT-rich ODN  $\text{d}(\text{ATATATATATAT})_2$  titrations that shown in Figure 2c-d. The most significant basis spectra, as judged by the magnitude of the singular values, correspond to spectral intensity.

## UV-Vis titration spectra of $\text{Py}_4\text{-dmbpy-Cu}^{\text{II}}$ with alternative oligonucleotides

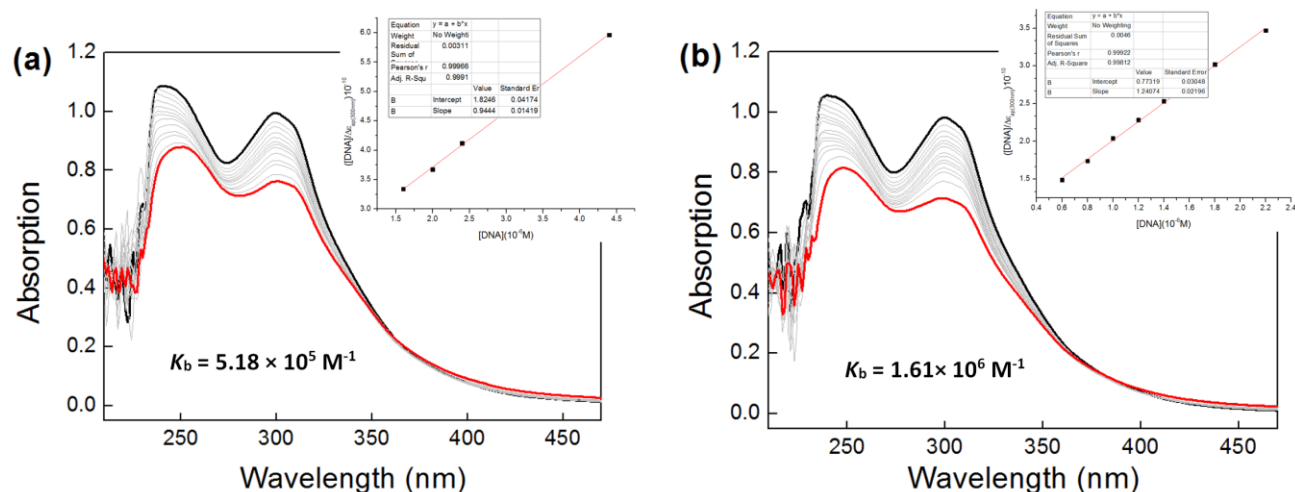

**Fig. S2** UV-Vis titration spectra of  $\text{Py}_4\text{-dmbpy-Cu}^{\text{II}}$  with (a) AT-rich  $\text{d}(\text{ATATATATATAT})_2$  ( $r = 0-0.02$  from black line to red line) and (b) GC-rich  $\text{d}(\text{TCGGGGCCCCGA})_2$  ( $r = 0-0.015$  from black line to red line) sequences in MOPS buffer (20mM, pH=6.5).  $t = 25^\circ\text{C}$ . The insert figure represents the least squares linear fit of the data.  $r = \text{ODN}/\text{Py}_4\text{-dmbpy-Cu}^{\text{II}}$ .

## References

- [1] N. S. Oltra, G. Roelfes, *Chem. Commun.* **2008**, 6039-6041.
- [2] J. J. Marek, R. P. Singh, A. Heuer, U. Hennecke, *Chem. Eur. J.* **2017**, 23, 6004–6008.
